# Supplementary material for: Species-level studies do not upscale to community-wide plant-soil feedbacks
Source: Research Square preprint supplement (doi:10.21203/rs.3.rs-6100233/v1), 2025-03-04
Supplement: Supplementary file 1 [file f4be37bb50bb4b2b8acdaec9.docx]

**Supporting materials**


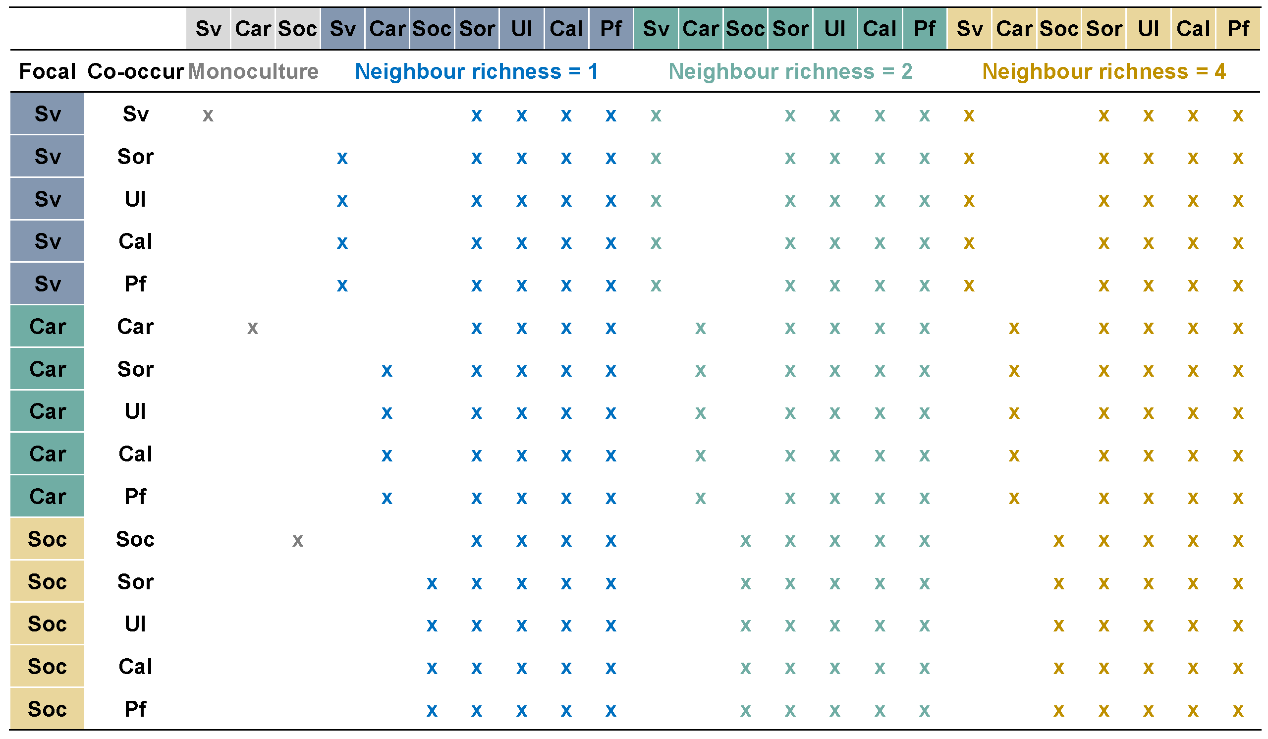


**Fig. S1 Experimental design for the ‘Neighbouring effect experiment’, testing the effects of neighbouring species richness on the rhizosphere community for the three species.** Plant community composition of each pot when the focal (Focal) plant species was Sv, Car and Soc. The three individuals that were grown close to the focal individuals (Co-occur) were either the same as the focal species or three of one of four other species. The eight neighbouring plants were from 1 (8 each), 2 (4 each) or 4 (2 each) species (Neighbour) from a pool of the focal plant species plus the four other species. Focal specie monocultures were treated as control. Different letters indicate individual plant species (For detailed information, please see Table S2).


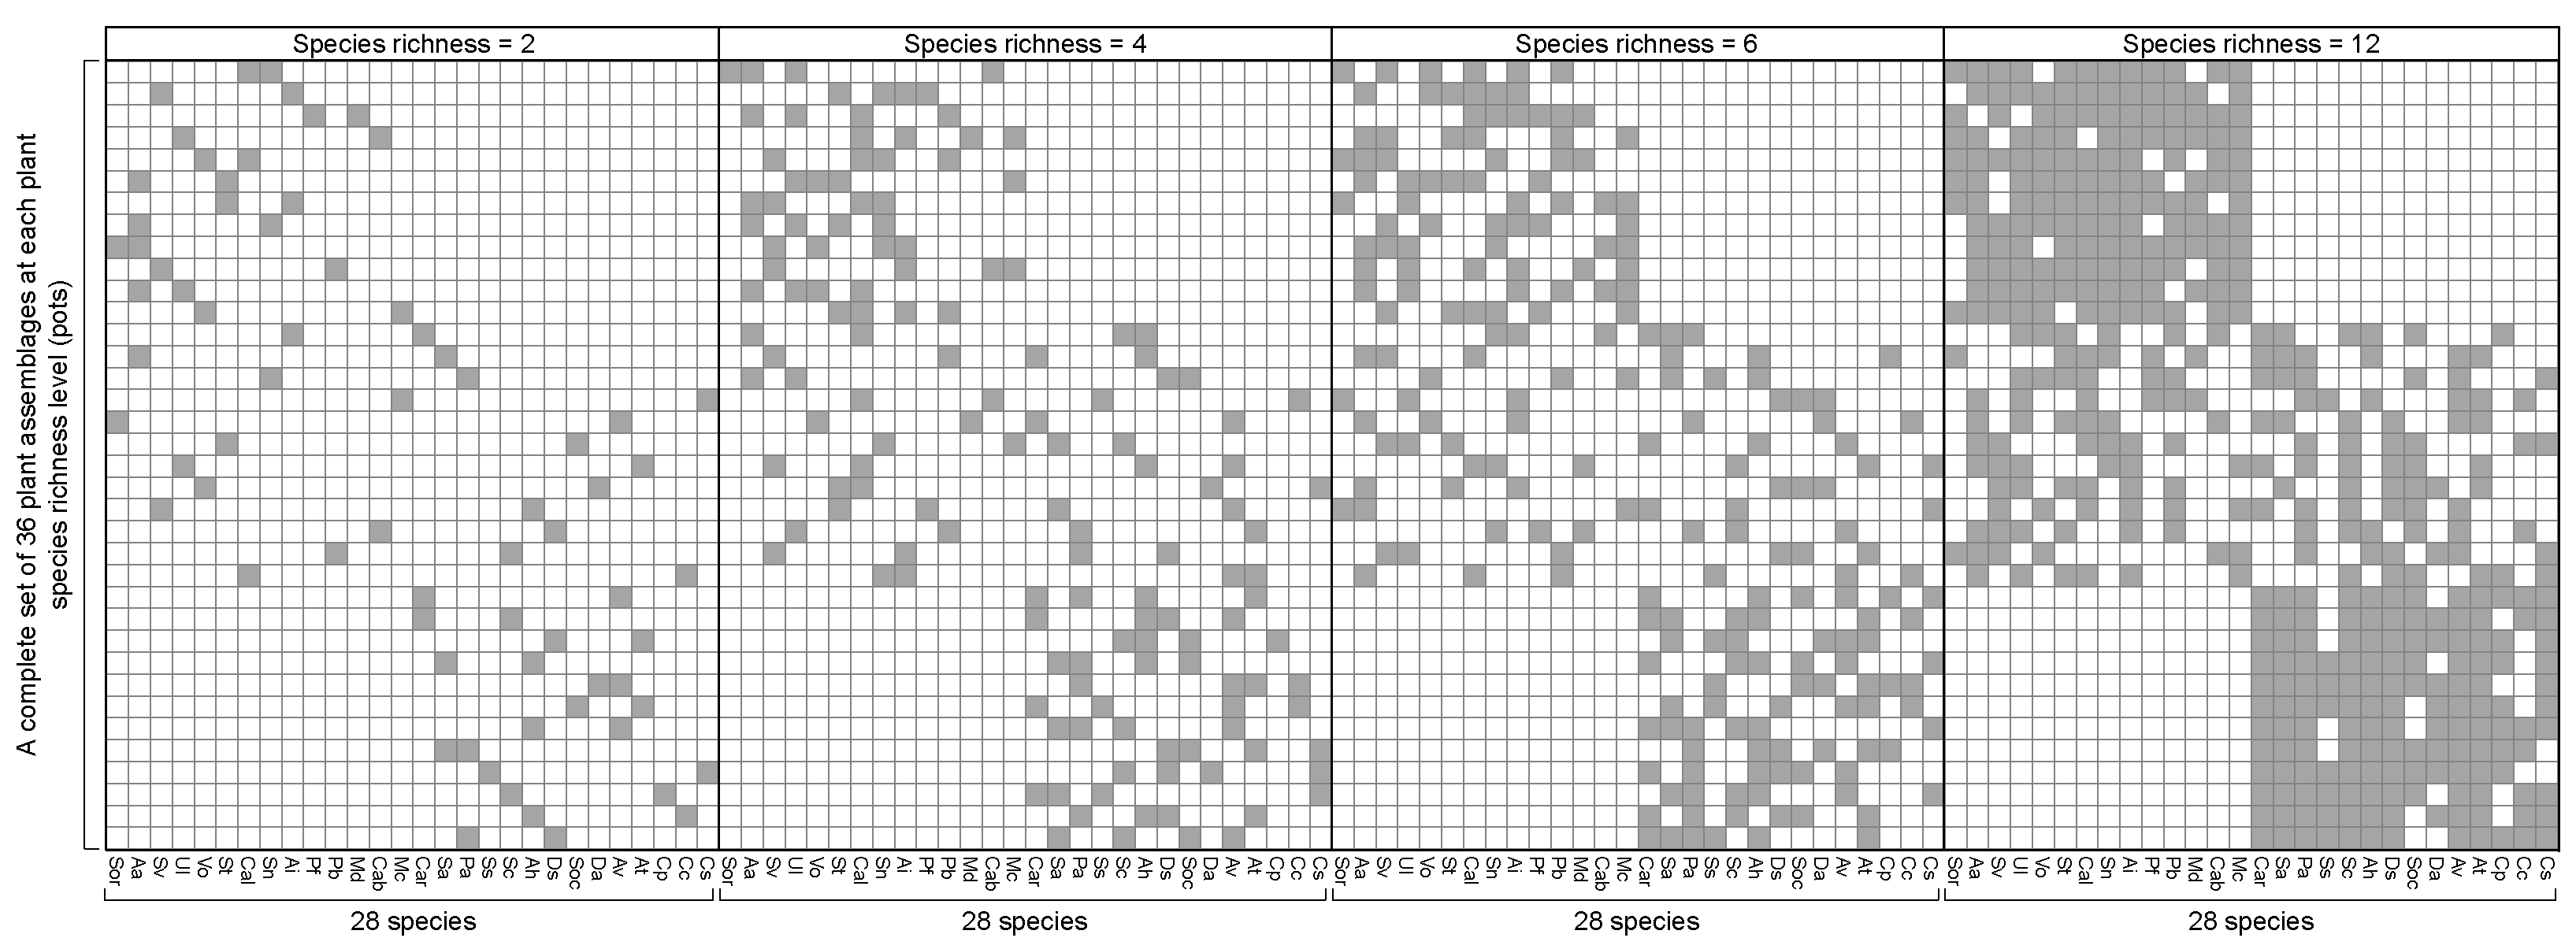


**Fig.** **S2** **Overview of the composition of conditioning species or communities in the PSF experiment.** Grey filling indicates the presence of the plant species, while different letters indicate individual plant species (For detailed information, please see Table S2). Monocultures of 28 species (N = 5) is not shown. The responding species is composed of six species (Aa, Sv, St, Ah, Soc and *Paspalum conjugatum*) and kept identical.

**Table S1** Details on the literature synthesis, including publication year and the maximum number of conditioning species per experimental unit. The number(s) within the brackets are the bibliography number of reference(s).

| Year | **The maximum number of conditioning plant species per experimental unit** | | | | | | | | | | |
| --- | --- | --- | --- | --- | --- | --- | --- | --- | --- | --- | --- |
| 1 | 2 | 3 | 4 | 5 | 6 | 8 | 9 | 10 | 12 | > 12 |
| 1993 | *89* |  |  |  |  |  |  |  |  |  |  |
| 1994 | *90* |  |  |  |  |  |  |  |  |  |  |
| 1997 | *91* |  |  |  |  |  |  |  |  |  |  |
| 2001 | *92,93* |  |  |  |  |  |  |  |  |  |  |
| 2002 | *7,94* |  |  |  |  |  |  |  |  |  |  |
| 2004 | *6,95-98* |  |  |  |  |  |  |  |  |  |  |
| 2005 | *99,100* |  |  |  |  |  |  |  |  |  |  |
| 2006 | *101* |  |  |  |  |  |  |  |  |  | *102* |
| 2007 | *103-106* |  |  |  | *107* |  |  |  |  |  |  |
| 2008 | *108-112* |  |  |  |  |  |  |  |  |  |  |
| 2009 | *113-116* |  |  |  |  |  | *117* |  |  |  |  |
| 2010 | *59,118-128* |  |  |  |  |  |  |  |  |  |  |
| 2011 | *129-138* |  | *139* |  |  | *140* |  |  |  |  | *141* |
| 2012 | *142-156* |  |  |  |  | *157* |  |  |  |  |  |
| 2013 | *158-169* | *170* |  |  |  |  |  |  |  |  | *171* |
| 2014 | *172-180* |  | *181* | *182* |  |  |  |  |  |  |  |
| 2015 | *183-206* |  |  |  |  |  | *207* |  | *208* |  |  |
| 2016 | *209-231* | *232,233* |  | *234* |  |  |  |  |  |  |  |
| 2017 | *9,11,235-256* |  |  |  |  |  | *257* |  |  |  |  |
| 2018 | *45,258-292* | *293,294* |  | *295,296* |  |  | *297* |  |  |  |  |
| 2019 | *298-327* | *328,329* |  |  |  | *330* | *331* |  |  | *332* |  |
| 2020 | *333-372* |  | *373* | *374-376* |  |  | *377* | *378* |  |  | *379* |
| 2021 | *33,37,380-411* | *412* |  | *413* |  | *414,415* |  |  |  |  |  |
| 2022 | *12,416-447* | *448* |  | *449* |  |  | *450* |  |  | *451* |  |
| 2023 | *2,452-487* |  |  |  |  | *488* | *32* |  | *465* |  |  |
| 2024 | *489-522* | *523-525* |  |  |  |  | *526,527* |  |  |  | *528* |

**Table S2** List of plant species used for plant community construction along with their Abbreviations and life cycle (annual vs. perennial).

| Family | Plant species | Abbreviation | Life cycle |
| --- | --- | --- | --- |
| Amaranthaceae | *Achyranthes aspera* L. | Aa | Perennial (Die in the winter in Wuhan) |
| *Amaranthus hybridus* L. | Ah | Annual |
| *Amaranthus viridis* L. | Av | Annual |
| *Chenopodium album* L. | Cal | Annual |
| *Dysphania ambrosioides* (L.) Mosyakin & Clemants | Da | Perennial (Die in the winter in Wuhan) |
| *Celosia argentea* L. | Car | Annual |
| Asteraceae | *Carpesium abrotanoides* L. | Cab | Perennial (Die in the winter in Wuhan) |
| *Crassocephalum crepidioides* (Benth.) S. Moore | Cc | Annual |
| *Sigesbeckia orientalis* L. | Sor | Annual |
| *Symphyotrichum subulatum* (Michx.) G. L. Nesom | Ss | Annual |
| Cannabaceae | *Cannabis sativa* L. | Cs | Annual |
| Fabaceae | *Aeschynomene indica* L. | Ai | Annual |
| *Crotalaria pallida* Aiton | Cp | Perennial (Die in the winter in Wuhan) |
| *Senna occidentalis* (L.) Link | Soc | Annual |
| *Senna tora* (L.) Roxb. | St | Annual |
| *Sesbania cannabina* (Retz.) Poir. | Sc | Annual |
| Lamiaceae | *Mosla dianthera* (Buch.Ham. ex Roxb.) Maxim. | Md | Annual |
| *Perilla frutescens* (L.) Britton | Pf | Annual |
| Malvaceae | *Abutilon theophrasti* Medikus | At | Annual |
| *Melochia corchorifolia* L. | Mc | Annual |
| *Sida acuta*Burm. f. | Sa | Annual |
| *Urena lobata* L. | Ul | Annual |
| Poaceae | *Panicum bisulcatum* Thunb. | Pb | Annual |
| *Paspalum conjugatum* P.J.Bergius | Pc | Annual |
| *Setaria viridis* (L.) P. Beauv. | Sv | Annual |
| Solanaceae | *Datura stramonium* L. | Ds | Annual |
| *Physalis angulata* L. | Pa | Annual |
| *Solanum nigrum* L. | Sn | Annual |
| Verbenaceae | *Verbena officinalis* L. | Vo | Perennial (Die in the winter in Wuhan) |

**Table S3** Effects of focal species identity (FS), neighbouring plant richness (NR) and their interaction (FS: NR) on the Shannon, Inverse Simpson index, and composition of focal species’ rhizosphere overall fungal communities (overall fungi), putative pathogenic fungal communities (pathogens) and Arbuscular mycorrhizal fungal communities (AMF). Significant *P* values are presented in bold based on chi-square test (*P* < 0.05) or permutation tests. *P* values are adjusted with the Bonferroni method.

|  |  | Overall fungi | | | Pathogens | | | AMF | | |
| --- | --- | --- | --- | --- | --- | --- | --- | --- | --- | --- |
| Variables | df | χ2 | *P* | *P*_adjust | χ2 | *P* | *P*_adjust | χ2 | *P* | *P*_adjust |
| **Shannon** |  |  |  |  |  |  |  |  |  |  |
| (Intercept) | 1 | 1187.314 | **<0.001** | **<0.001** | 114.847 | **<0.001** | **<0.001** | 892.437 | **<0.001** | **<0.001** |
| Focal species identity (FS) | 2 | 16.216 | **<0.001** | **0.007** | 186.093 | **<0.001** | **<0.001** | 14.255 | **<0.001** | **0.019** |
| Neighbouring plant richness (NR) | 1 | 0.051 | 0.822 | 1.000 | 15.031 | **<0.001** | **0.003** | 20.969 | **<0.001** | **<0.001** |
| FS: NR | 2 | 2.856 | 0.240 | 1.000 | 30.495 | **<0.001** | **<0.001** | 18.083 | **<0.001** | **0.003** |
| **Inverse Simpson** |  |  |  |  |  |  |  |  |  |  |
| (Intercept) | 1 | 43.705 | **<0.001** | **<0.001** | 17.037 | **<0.001** | **0.001** | 234.87 | **<0.001** | **<0.001** |
| Focal species identity (FS) | 2 | 39.155 | **<0.001** | **<0.001** | 206.98 | **<0.001** | **<0.001** | 15.483 | **<0.001** | **0.010** |
| Neighbouring plant richness (NR) | 1 | 1.526 | 0.217 | 1.000 | 13.456 | **<0.001** | **0.006** | 20.244 | **<0.001** | **<0.001** |
| FS: NR | 2 | 6.731 | **0.035** | 0.829 | 35.831 | **<0.001** | **<0.001** | 20.43 | **<0.001** | **0.001** |
|  |  |  |  |  |  |  |  |  |  |  |
| **Composition** | df | Variance | F | *P* | Variance | F | *P* | Variance | F | *P* |
| Focal species identity (FS) | 2 | 583.10 | 22.33 | **<0.001** | 38.396 | 46.4423 | **<0.001** | 43.40 | 16.96 | **<0.001** |
| Neighbouring plant richness (NR) | 1 | 64.40 | 4.93 | **<0.001** | 2.69 | 6.50 | **<0.001** | 5.74 | 4.48 | **<0.001** |
| FS: NR | 2 | 141.70 | 5.43 | **<0.001** | 4.28 | 5.17 | **<0.001** | 10.95 | 4.28 | **<0.001** |
| Residual | 270 | 3254.50 |  |  | 111.61 |  |  | 345.52 |  |  |

**Table S4** Correlations between neighbouring plant richness and the diversity indexes (Shannon and Inverse Simpson index) for the rhizosphere overall fungal communities (overall fungi), putative pathogenic fungal communities (pathogens) and Arbuscular mycorrhizal fungal communities (AMF) of the three focal plant species. Model parameters are given. Sv: *Setaria viridis*; Car*: Celosia argentea,* Soc: *Senna occidentalis*. CI: 95% confidential interval. Significant correlations are presented in bold (*P* < 0.05).

|  | Overall fungi | | | | Pathogens | | | | | | AMF | | | |
| --- | --- | --- | --- | --- | --- | --- | --- | --- | --- | --- | --- | --- | --- | --- |
| Variables | lower CI | upper CI | t | *P* | | lower CI | upper CI | t | *P* | lower CI | | upper CI | t | *P* | |
| **Shannon** |  |  |  |  | |  |  |  |  |  | |  |  |  | |
| Sv | -0.094 | 0.075 | -0.225 | 0.822 | | 0.055 | 0.167 | 3.877 | **<0.001** | -0.226 | | -0.090 | -4.579 | **<0.001** | |
| Car | -0.211 | -0.024 | -2.483 | **0.014** | | -0.114 | 0.010 | -1.658 | 0.098 | -0.050 | | 0.099 | 0.640 | 0.522 | |
| Soc | -0.144 | 0.025 | -1.379 | 0.169 | | -0.161 | -0.048 | -3.645 | **<0.001** | -0.043 | | 0.093 | 0.718 | 0.473 | |
| **Inverse Simpson** |  |  |  |  | |  |  |  |  |  | |  |  |  | |
| Sv | -0.626 | 2.734 | 1.235 | 0.218 | | 0.164 | 0.545 | 3.668 | **<0.001** | -1.900 | | -0.744 | -4.500 | **<0.001** | |
| Car | -4.019 | -0.308 | -2.296 | **0.022** | | -0.631 | -0.212 | -3.955 | **<0.001** | -0.156 | | 1.119 | 1.488 | 0.138 | |
| Soc | -2.671 | 0.689 | -1.161 | 0.246 | | -0.498 | -0.118 | -3.186 | **0.002** | -0.410 | | 0.747 | 0.573 | 0.567 | |

**Table S5** The contribution of focal plant identity (FS), neighbouring community richness (NR) and their interactions (FS: NR) to the variation in diversity and composition of the focal species’ rhizosphere overall fungal communities (overall fungi), putative pathogenic fungal communities (pathogens) and Arbuscular mycorrhizal fungal communities (AMF). The explained variance (R2) of each variable and the percentage contribution of explained variance (%) for FS, NR and FS: NR are presented.

|  | Shannon | | Inverse Simpson | | Composition | | |
| --- | --- | --- | --- | --- | --- | --- | --- |
| Variables | Explained variance (R2) | Percentage contributions  (%) | Explained variance R2 | Percentage contributions  (%) | Explained variance (R2) | | Percentage contributions  (%) | |
| **Overall fungi** |  |  |  |  | |  |  | |
| Focal species identity (FS) | 0.171 | 88.235 | 0.289 | 93.409 | | 0.135 | 73.883 | |
| Neighbouring plant richness (NR) | 0.015 | 7.607 | 0.004 | 1.159 | | 0.015 | 8.159 | |
| FS: NR | 0.008 | 4.158 | 0.017 | 5.432 | | 0.033 | 17.958 | |
| Residual | 0.806 |  | 0.690 |  | | 0.817 |  | |
| **Pathogens** |  |  |  |  | |  |  | |
| Focal species identity (FS) | 0.705 | 95.943 | 0.649 | 93.726 | | 0.245 | 84.644 | |
| Neighbouring plant richness (NR) | 0.001 | 0.075 | 0.004 | 0.546 | | 0.017 | 5.927 | |
| FS: NR | 0.029 | 3.982 | 0.040 | 5.728 | | 0.027 | 9.429 | |
| Residual | 0.265 |  | 0.306 |  | | 0.711 |  | |
| **AMF** |  |  |  |  | |  |  | |
| Focal species identity (FS) | 0.020 | 21.345 | 0.014 | 16.045 | | 0.107 | 72.223 | |
| Neighbouring plant richness (NR) | 0.012 | 13.694 | 0.008 | 8.675 | | 0.014 | 9.550 | |
| FS: NR | 0.060 | 64.961 | 0.067 | 75.280 | | 0.027 | 18.227 | |
| Residual | 0.908 |  | 0.911 |  | | 0.852 |  | |

**Table** **S6** Effect size estimates across all single species and species richness levels, while different letters indicate individual plant species (For detailed information, please see Table S2). Model parameters are given. Significant *P* values (*P* < 0.05), compared to the control (plants were grown in sterilized soil for the PSF experiment), are presented in bold. CI: confidential interval.

| Total biomass of responding communities in the PSF experiment | | | | | | | | | | |
| --- | --- | --- | --- | --- | --- | --- | --- | --- | --- | --- |
| target | CI 2.5% | mean | CI 97.5% | *P* |  | target | CI 2.5% | mean | CI 97.5% | *P* |
| Control | 79.508 | 87.094 | 94.656 | 1.000 |  | Ss | 57.270 | 63.167 | 68.307 | **<0.001** |
| Sor | 61.611 | 66.205 | 71.364 | **<0.001** |  | Sc | 59.402 | 65.506 | 72.484 | **<0.001** |
| Aa | 62.044 | 65.266 | 68.550 | **<0.001** |  | Ah | 50.792 | 60.700 | 72.918 | **<0.001** |
| Sv | 52.822 | 66.711 | 80.686 | **0.003** |  | Ds | 54.912 | 67.303 | 78.194 | **0.001** |
| Ul | 56.906 | 60.303 | 63.146 | **<0.001** |  | Soc | 60.893 | 70.586 | 80.742 | **0.004** |
| Vo | 69.984 | 77.437 | 87.868 | 0.069 |  | Da | 66.430 | 74.117 | 81.046 | **0.010** |
| St | 59.540 | 69.148 | 77.219 | **<0.001** |  | Av | 59.044 | 69.463 | 81.694 | **0.004** |
| Cal | 61.462 | 73.383 | 84.504 | **0.019** |  | At | 66.532 | 75.030 | 85.642 | **0.034** |
| Sn | 65.586 | 69.176 | 73.166 | **<0.001** |  | Cp | 58.758 | 66.245 | 75.730 | **0.001** |
| Ai | 65.472 | 70.277 | 76.124 | **<0.001** |  | Cc | 58.797 | 70.438 | 80.418 | **0.001** |
| Pf | 59.592 | 68.812 | 77.208 | **0.001** |  | Cs | 70.135 | 77.644 | 86.862 | 0.067 |
| Pb | 59.426 | 67.541 | 74.520 | **<0.001** |  | 1 | 66.723 | 68.355 | 70.125 | **<0.001** |
| Md | 68.608 | 75.141 | 82.310 | **0.010** |  | 2 | 63.949 | 68.139 | 72.419 | **<0.001** |
| Cab | 61.330 | 64.743 | 68.986 | **<0.001** |  | 4 | 61.342 | 64.163 | 66.989 | **<0.001** |
| Mc | 51.860 | 58.852 | 63.992 | **<0.001** |  | 6 | 63.954 | 67.253 | 70.958 | **<0.001** |
| Car | 61.204 | 70.252 | 78.282 | **<0.001** |  | 12 | 62.896 | 65.853 | 69.123 | **<0.001** |
| Sa | 65.420 | 69.014 | 73.058 | **<0.001** |  |  |  |  |  |  |
| Pa | 54.838 | 63.262 | 70.919 | **<0.001** |  |  |  |  |  |  |

**Table S7** Effect size estimates and predictability tests across species richness levels. For each response variable at each species richness level, *P* values were calculated under each assumption to assess the likelihood that the observed mean effect size differs from the predicted value by chance. Model parameters are given. Significant *P* values (*P* < 0.05) are presented in bold. CI: confidential interval.

| Richness | Model | Total biomass of responding communities for PSF Experiment | | | |
| --- | --- | --- | --- | --- | --- |
| CI 2.5% | mean | CI 97.5% | *P* |
| 1 | Actual | -27.113 | -18.554 | -10.772 | 1.000 |
| Additive | -32.251 | -18.498 | -3.242 | 0.496 |
| Multiplicative | -32.627 | -18.775 | -4.557 | 0.491 |
| Dominative | -32.588 | -18.394 | -3.286 | 0.489 |
| 2 | Actual | -27.552 | -18.883 | -10.170 | 1.000 |
| Additive | -59.614 | -37.816 | -13.600 | 0.062 |
| Multiplicative | -50.338 | -33.627 | -14.834 | 0.079 |
| Dominative | -34.624 | -22.693 | -9.156 | 0.319 |
| 4 | Actual | -31.783 | -22.955 | -14.620 | 1.000 |
| Additive | -114.229 | -75.702 | -35.036 | **0.006** |
| Multiplicative | -71.724 | -53.864 | -30.716 | **0.013** |
| Dominative | -37.077 | -25.593 | -13.732 | 0.343 |
| 6 | Actual | -28.533 | -19.744 | -11.344 | 1.000 |
| Additive | -166.996 | -112.489 | -57.502 | **<0.001** |
| Multiplicative | -82.843 | -66.246 | -44.627 | **<0.001** |
| Dominative | -38.644 | -27.198 | -16.546 | 0.149 |
| 12 | Actual | -29.707 | -21.181 | -12.984 | 1.000 |
| Additive | -327.947 | -227.672 | -125.397 | **<0.001** |
| Multiplicative | -93.387 | -81.932 | -67.509 | **<0.001** |
| Dominative | -39.607 | -29.203 | -19.293 | 0.120 |

**Table S8** Effects of focal species identity (FS), neighbouring plant richness (NR), co-occur plant species type (COT) and their interactions on the diversity indexes (Shannon and Inverse Simpson index) of focal species’ rhizosphere overall fungal communities (overall fungi), putative pathogenic fungal communities (pathogens) and Arbuscular mycorrhizal fungal communities (AMF). Degrees of freedom (df), chi-square (χ2), *P* values and adjusted *P* values are presented. *P* values are adjusted with the Bonferroni method. Significant *P* values are presented in bold based on chi-square test (*P* < 0.05).

|  |  | Overall fungi | | | Pathogens | | | AMF | |  | |  |
| --- | --- | --- | --- | --- | --- | --- | --- | --- | --- | --- | --- | --- |
| Varibales | df | χ2 | *P* | *P*_adjust | χ2 | *P* | *P*_adjust | χ2 | *P* | | *P*_adjust | |
| **Shannon** |  |  |  |  |  |  |  |  |  | |  | |
| (Intercept) | 1 | 1167.495 | **<0.001** | **<0.001** | 81.664 | **<0.001** | **<0.001** | 730.311 | **<0.001** | | **<0.001** | |
| Focal species identity (FS) | 2 | 15.998 | **<0.001** | **0.016** | 168.961 | **<0.001** | **<0.001** | 10.722 | **0.005** | | 0.225 | |
| Neighbouring plant richness (NR) | 1 | 0.034 | 0.855 | 1.000 | 23.762 | **<0.001** | **<0.001** | 18.297 | **<0.001** | | **0.001** | |
| Co-occur plant species type (COT) | 1 | 1.359 | 0.244 | 1.000 | 5.688 | **0.017** | 0.820 | 0.074 | 0.786 | | 1.000 | |
| FS: NR | 2 | 4.394 | 0.111 | 1.000 | 31.282 | **<0.001** | **<0.001** | 14.396 | **0.001** | | **0.036** | |
| FS: COT | 2 | 0.575 | 0.750 | 1.000 | 0.451 | 0.798 | 1.000 | 0.441 | 0.802 | | 1.000 | |
| NR: COT | 1 | 0.793 | 0.373 | 1.000 | 8.099 | **0.004** | 0.213 | 0.066 | 0.797 | | 1.000 | |
| FS: NR: COT | 2 | 1.479 | 0.477 | 1.000 | 0.881 | 0.644 | 1.000 | 0.030 | 0.985 | | 1.000 | |
| **Inversed Simpson** |  |  |  |  |  |  |  |  |  | |  | |
| (Intercept) | 1 | 29.228 | **<0.001** | **<0.001** | 10.047 | **0.002** | 0.073 | 183.059 | **<0.001** | | **<0.001** | |
| Focal species identity (FS) | 2 | 37.414 | **<0.001** | **<0.001** | 170.192 | **<0.001** | **<0.001** | 11.866 | **0.003** | | 0.127 | |
| Neighbouring plant richness (NR) | 1 | 3.845 | **0.050** | 1.000 | 19.123 | **<0.001** | **0.001** | 14.493 | **<0.001** | | **0.007** | |
| Co-occur plant species type (COT) | 1 | 2.591 | 0.107 | 1.000 | 2.479 | 0.115 | 1.000 | 0.889 | 0.346 | | 1.000 | |
| FS: NR | 2 | 9.605 | **0.008** | 0.394 | 29.761 | **<0.001** | **<0.001** | 15.402 | **<0.001** | | **0.022** | |
| FS: COT | 2 | 0.436 | 0.804 | 1.000 | 0.681 | 0.711 | 1.000 | 1.272 | 0.530 | | 1.000 | |
| NR: COT | 1 | 3.564 | 0.059 | 1.000 | 4.656 | **0.031** | 1.000 | 0.423 | 0.516 | | 1.000 | |
| FS: NR: COT | 2 | 2.383 | 0.304 | 1.000 | 0.827 | 0.661 | 1.000 | 0.333 | 0.847 | | 1.000 | |

**Table S9** Effects of the presence of plant species in the responding plant community that were also used in the conditioning phase (i.e., Aa_con, Sv_con, St_con, Ah_con, and Soc_con; for detailed information on plant species abbreviations, please see Table S2) and the species richness during the conditioning phase (Richness_con) on the responding plant community biomass in the PSF experiment. Note: plant species “c” was absent in the conditioning community. Degrees of freedom (df), *F* values, *P* values and adjusted *P* values are presented. *P* values are adjusted with the Bonferroni method. Significant *P* values are presented in bold based on chi-square test (*P* < 0.05).

| Varibales | df | *F* | *P* | *P*_adjust |
| --- | --- | --- | --- | --- |
| Richness_con | 5, 258 | 4.18 | **0.001** | **0.012** |
| Aa_con | 1, 258 | 0.15 | 0.697 | 1.000 |
| Sv_con | 1, 258 | 3.75 | 0.054 | 0.592 |
| St_con | 1, 258 | 0.87 | 0.353 | 1.000 |
| Ah_con | 1, 258 | 1.03 | 0.310 | 1.000 |
| Soc_con | 1, 258 | 0.08 | 0.782 | 1.000 |
| Richness_con:Aa_con | 4, 258 | 0.31 | 0.869 | 1.000 |
| Richness_con: Sv_con | 4, 258 | 1.06 | 0.379 | 1.000 |
| Richness_con: St_con | 4, 258 | 0.33 | 0.857 | 1.000 |
| Richness_con: Ah_con | 4, 258 | 0.95 | 0.433 | 1.000 |
| Richness_con: Soc_con | 4, 258 | 0.54 | 0.709 | 1.000 |

**References**

89 Van der putten, W. H., Vandijk, C. & Peters, B. A. M. Plant-specific soil-borne diseases contribute to succession in foredune vegetation. *Nature* **362**, 53-56 (1993).

90 Bever, J. D. Feedback between plants and their soil communities in an old field community. *Ecology* **75**, 1965-1977 (1994).

91 Van der Putten, W. H. & Peters, B. A. M. How soil-borne pathogens may affect plant competition. *Ecology* **78**, 1785-1795 (1997).

92 Matthews, J. W. & Clay, K. Influence of fungal endophyte infection on plant-soil feedback and community interactions. *Ecology* **82**, 500-509 (2001).

93 Westover, K. M. & Bever, J. D. Mechanisms of plant species coexistence: roles of rhizosphere bacteria and root fungal pathogens. *Ecology* **82**, 3285-3294 (2001).

94 Bever, J. D. Negative feedback within a mutualism: host-specific growth of mycorrhizal fungi reduces plant benefit. *Proc. R. Soc. B: Biol. Sci.* **269**, 2595-2601 (2002).

95 Gustafson, D. J. & Casper, B. B. Nutrient addition affects AM fungal performance and expression of plant/fungal feedback in three serpentine grasses. *Plant Soil* **259**, 9-17 (2004).

96 Knevel, I. C., Lans, T., Menting, F. B. J., Hertling, U. M. & van der Putten, W. H. Release from native root herbivores and biotic resistance by soil pathogens in a new habitat both affect the alien *Ammophila arenaria* in South Africa. *Oecologia* **141**, 502-510 (2004).

97 Reinhart, K. O. & Callaway, R. M. Soil biota facilitate exotic *Acer* invasions in Europe and North America. *Ecol. Appl.* **14**, 1737-1745 (2004).

98 Callaway, R. M., Thelen, G. C., Barth, S., Ramsey, P. W. & Gannon, J. E. Soil fungi alter interactions between the invader *Centaurea maculosa* and North American natives. *Ecology* **85**, 1062-1071 (2004).

99 Reinhart, K. O., Royo, A. A., Van der Putten, W. H. & Clay, K. Soil feedback and pathogen activity in *Prunus serotina* throughout its native range. *J. Ecol.* **93**, 890-898 (2005).

100 Bonanomi, G. & Mazzoleni, S. Soil history affects plant growth and competitive ability in herbaceous species. *Community Ecol.* **6**, 23-28 (2005).

101 Bezemer, T. M. *et al.* Plant species and functional group effects on abiotic and microbial soil properties and plant-soil feedback responses in two grasslands. *J. Ecol.* **94**, 893-904 (2006).

102 Bezemer, T. M., Harvey, J. A., Kowalchuk, G. A., Korpershoek, H. & van der Putten, W. H. Interplay between *Senecio jacobaea* and plant, soil, and aboveground insect community composition. *Ecology* **87**, 2002-2013 (2006).

103 Casper, B. B. & Castelli, J. P. Evaluating plant-soil feedback together with competition in a serpentine grassland. *Ecol. Lett.* **10**, 394-400 (2007).

104 Nijjer, S., Rogers, W. E. & Siemann, E. Negative plant-soil feedbacks may limit persistence of an invasive tree due to rapid accumulation of soil pathogens. *Proc. R. Soc. B: Biol. Sci.* **274**, 2621-2627 (2007).

105 van Grunsven, R. H. A. *et al.* Reduced plant-soil feedback of plant species expanding their range as compared to natives. *J. Ecol.* **95**, 1050-1057 (2007).

106 van der Putten, W. H. *et al.* Soil feedback of exotic savanna grass relates to pathogen absence and mycorrhizal selectivity. *Ecology* **88**, 978-988 (2007).

107 Kardol, P., Cornips, N. J., van Kempen, M. M. L., Bakx-Schotman, J. M. T. & van der Putten, W. H. Microbe-mediated plant-soil feedback causes historical contingency effects in plant community assembly. *Ecol. Monogr.* **77**, 147-162 (2007).

108 Petermann, J. S., Fergus, A. J. F., Turnbull, L. A. & Schmid, B. Janzen-Connell effects are widespread and strong enough to maintain diversity in grasslands. *Ecology* **89**, 2399-2406 (2008).

109 Manning, P., Morrison, S. A., Bonkowski, M. & Bardgett, R. D. Nitrogen enrichment modifies plant community structure via changes to plant-soil feedback. *Oecologia* **157**, 661-673 (2008).

110 Casper, B. B. *et al.* Plant-soil feedback: testing the generality with the same grasses in serpentine and prairie soils. *Ecology* **89**, 2154-2164 (2008).

111 Batten, K. M., Scow, K. M. & Espeland, E. K. Soil microbial community associated with an invasive grass differentially impacts native plant performance. *Microb. Ecol.* **55**, 220-228 (2008).

112 McCarthy-Neumann, S. & Kobe, R. K. Tolerance of soil pathogens co-varies with shade tolerance across species of tropical tree seedlings. *Ecology* **89**, 1883-1892 (2008).

113 Lankau, R. A., Nuzzo, V., Spyreas, G. & Davis, A. S. Evolutionary limits ameliorate the negative impact of an invasive plant. *Proc. Natl. Acad. Sci. USA* **106**, 15362-15367 (2009).

114 Rudgers, J. A. & Orr, S. Non-native grass alters growth of native tree species via leaf and soil microbes. *J. Ecol.* **97**, 247-255 (2009).

115 te Beest, M., Stevens, N., Olff, H. & van der Putten, W. H. Plant-soil feedback induces shifts in biomass allocation in the invasive plant *Chromolaena odorata*. *J. Ecol.* **97**, 1281-1290 (2009).

116 Markham, J. H., Grime, J. P. & Buckland, S. Reciprocal interactions between plants and soil in an upland grassland. *Ecol. Res.* **24**, 93-98 (2009).

117 Vogelsang, K. M. & Bever, J. D. Mycorrhizal densities decline in association with nonnative plants and contribute to plant invasion. *Ecology* **90**, 399-407 (2009).

118 McCarthy-Neumann, S. & Kobe, R. K. Conspecific and heterospecific plant-soil feedbacks influence survivorship and growth of temperate tree seedlings. *J. Ecol.* **98**, 408-418 (2010).

119 McCarthy-Neumann, S. & Kobe, R. K. Conspecific plant-soil feedbacks reduce survivorship and growth of tropical tree seedlings. *J. Ecol.* **98**, 396-407 (2010).

120 Harrison, K. A. & Bardgett, R. D. Influence of plant species and soil conditions on plant-soil feedback in mixed grassland communities. *J. Ecol.* **98**, 384-395 (2010).

121 Mangan, S. A. *et al.* Negative plant-soil feedback predicts tree-species relative abundance in a tropical forest. *Nature* **466**, 752-U710 (2010).

122 Diez, J. M. *et al.* Negative soil feedbacks accumulate over time for non-native plant species. *Ecol. Lett.* **13**, 803-809 (2010).

123 de la Peña, E. *et al.* Plant-soil feedback as a mechanism of invasion by *Carpobrotus edulis*. *Biol. Invasions* **12**, 3637-3648 (2010).

124 van Grunsven, R. H. A., van der Putten, W. H., Bezemer, T. M. & Veenendaal, E. M. Plant-soil feedback of native and range-expanding plant species is insensitive to temperature. *Oecologia* **162**, 1059-1069 (2010).

125 van Grunsven, R. H. A., van der Putten, W. H., Bezemer, T. M., Berendse, F. & Veenendaal, E. M. Plant-soil interactions in the expansion and native range of a poleward shifting plant species. *Glob. Change Biol.* **16**, 380-385 (2010).

126 Kueffer, C. Reduced risk for positive soil-feedback on seedling regeneration by invasive trees on a very nutrient-poor soil in Seychelles. *Biol. Invasions* **12**, 97-102 (2010).

127 Pregitzer, C. C., Bailey, J. K., Hart, S. C. & Schweitzer, J. A. Soils as agents of selection: feedbacks between plants and soils alter seedling survival and performance. *Evol. Ecol.* **24**, 1045-1059 (2010).

128 Mangan, S. A., Herre, E. A. & Bever, J. D. Specificity between Neotropical tree seedlings and their fungal mutualists leads to plant-soil feedback. *Ecology* **91**, 2594-2603 (2010).

129 Okalebo, J. *et al.* Biological suppression of velvetleaf (*Abutilon theophrasti*) in an Eastern Nebraska soil. *Weed Res.* **59**, 155-161 (2011).

130 Dostál, P. & Palecková, M. Does relatedness of natives used for soil conditioning influence plant-soil feedback of exotics? *Biol. Invasions* **13**, 331-340 (2011).

131 Meijer, S. S., Holmgren, M. & Van der Putten, W. H. Effects of plant-soil feedback on tree seedling growth under arid conditions. *J. Plant Ecol.* **4**, 193-200 (2011).

132 van de Voorde, T. F. J., van der Putten, W. H. & Bezemer, T. M. Intra- and interspecific plant-soil interactions, soil legacies and priority effects during old-field succession. *J. Ecol.* **99**, 945-953 (2011).

133 Kulmatiski, A. & Beard, K. H. Long-term plant growth legacies overwhelm short-term plant growth effects on soil microbial community structure. *Soil Biol. Biochem.* **43**, 823-830 (2011).

134 Farrer, E. C. & Goldberg, D. E. Patterns and mechanisms of conspecific and heterospecific interactions in a dry perennial grassland. *J. Ecol.* **99**, 265-276 (2011).

135 Lankau, R. A., Wheeler, E., Bennett, A. E. & Strauss, S. Y. Plant-soil feedbacks contribute to an intransitive competitive network that promotes both genetic and species diversity. *J. Ecol.* **99**, 176-185 (2011).

136 Felker-Quinn, E., Bailey, J. K. & Schweitzer, J. A. Soil biota drive expression of genetic variation and development of population-specific feedbacks in an invasive plant. *Ecology* **92**, 1208-1214 (2011).

137 Andonian, K. & Hierro, J. L. Species interactions contribute to the success of a global plant invader. *Biol. Invasions* **13**, 2957-2965 (2011).

138 MacDougall, A. S., Rillig, M. C. & Klironomos, J. N. Weak conspecific feedbacks and exotic dominance in a species-rich savannah. *Proc. R. Soc. B: Biol. Sci.* **278**, 2939-2945 (2011).

139 Andonian, K. *et al.* Range-expanding populations of a globally introduced weed experience negative plant-soil feedbacks. *Plos One* **6**, e20117 (2011).

140 Jordan, N. R., Larson, D. L. & Huerd, S. C. Evidence of qualitative differences between soil-occupancy effects of invasive *vs*. native grassland plant species. *Invasive Plant Sci. Manag.* **4**, 11-21 (2011).

141 Schnitzer, S. A. *et al.* Soil microbes drive the classic plant diversity-productivity pattern. *Ecology* **92**, 296-303 (2011).

142 Liu, Y., Yu, S., Xie, Z.-P. & Staehelin, C. Analysis of a negative plant-soil feedback in a subtropical monsoon forest. *J. Ecol.* **100**, 1019-1028 (2012).

143 van de Voorde, T. F. J., Ruijten, M., van der Putten, W. H. & Bezemer, T. M. Can the negative plant-soil feedback of *Jacobaea vulgaris* be explained by autotoxicity? *Basic Appl. Ecol.* **13**, 533-541 (2012).

144 Reinhart, K. O., Johnson, D. & Clay, K. Conspecific plant-soil feedbacks of temperate tree species in the southern Appalachians, USA. *Plos One* **7**, e40680 (2012).

145 Liu, X. B. *et al.* Experimental evidence for a phylogenetic Janzen-Connell effect in a subtropical forest. *Ecol. Lett.* **15**, 111-118 (2012).

146 Kostenko, O., van de Voorde, T. F. J., Mulder, P. P. J., van der Putten, W. H. & Bezemer, T. M. Legacy effects of aboveground-belowground interactions. *Ecol. Lett.* **15**, 813-821 (2012).

147 Padilla, F. M., Mattingly, W. B., Swedo, B. L., Clay, K. & Reynolds, H. L. Negative plant-soil feedbacks dominate seedling competitive interactions of North American successional grassland species. *J. Veg. Sci.* **23**, 667-676 (2012).

148 Reinhart, K. O. The organization of plant communities: negative plant-soil feedbacks and semiarid grasslands. *Ecology* **93**, 2377-2385 (2012).

149 Bonanomi, G., Esposito, A. & Mazzoleni, S. Plant-soil feedback in herbaceous species of Mediterranean coastal dunes. *Biol. Lett.* **49**, 35-44 (2012).

150 Smith, L. M. & Reynolds, H. L. Positive plant-soil feedback may drive dominance of a woodland invader, *Euonymus fortunei*. *Plant Ecol.* **213**, 853-860 (2012).

151 Lau, J. A. & Lennon, J. T. Rapid responses of soil microorganisms improve plant fitness in novel environments. *Proc. Natl. Acad. Sci. USA* **109**, 14058-14062 (2012).

152 Schradin, K. & Cipollini, D. The sign and strength of plant-soil feedback for the Invasive shrub, *Lonicera maackii*, varies in different soils. *Forests* **3**, 903-922 (2012).

153 Perkins, L. B. & Nowak, R. S. Soil conditioning and plant-soil feedbacks affect competitive relationships between native and invasive grasses. *Plant Ecol.* **213**, 1337-1344 (2012).

154 van de Voorde, T. F. J., van der Putten, W. H. & Bezemer, T. M. Soil inoculation method determines the strength of plant-soil interactions. *Soil Biol. Biochem.* **55**, 1-6 (2012).

155 McCarthy-Neumann, S. & Ibáñez, I. Tree range expansion may be enhanced by escape from negative plant-soil feedbacks. *Ecology* **93**, 2637-2649 (2012).

156 Verbruggen, E., Kiers, E. T., Bakelaar, P. N. C., Roling, W. F. M. & van der Heijden, M. G. A. Provision of contrasting ecosystem services by soil communities from different agricultural fields. *Plant Soil* **350**, 43-55 (2012).

157 Jordan, N. R., Aldrich-Wolfe, L., Huerd, S. C., Larson, D. L. & Muehlbauer, G. Soil-occupancy effects of invasive and native grassland plant species on composition and diversity of mycorrhizal associations. *Invasive Plant Sci. Manag.* **5**, 494-505 (2012).

158 Hovatter, S., Blackwood, C. B. & Case, A. L. Conspecific plant-soil feedback scales with population size in *Lobelia siphilitica* (Lobeliaceae). *Oecologia* **173**, 1295-1307 (2013).

159 Cripps, M. G., Edwards, G. R. & McKenzie, S. L. Grass species and their fungal symbionts affect subsequent forage growth. *Basic Appl. Ecol.* **14**, 225-234 (2013).

160 Hendriks, M. *et al.* Independent variations of plant and soil mixtures reveal soil feedback effects on plant community overyielding. *J. Ecol.* **101**, 287-297 (2013).

161 Perkins, L. B. & Nowak, R. S. Native and non-native grasses generate common types of plant-soil feedbacks by altering soil nutrients and microbial communities. *Oikos* **122**, 199-208 (2013).

162 Callaway, R. M., Montesinos, D., Williams, K. & Maron, J. L. Native congeners provide biotic resistance to invasive *Potentilla* through soil biota. *Ecology* **94**, 1223-1229 (2013).

163 Yang, Q. *et al.* Plant-soil biota interactions of an invasive species in. its native and introduced ranges: Implications for invasion success. *Soil Biol. Biochem.* **65**, 78-85 (2013).

164 McCarthy-Neumann, S. & Ibáñez, I. Plant-soil feedback links negative distance dependence and light gradient partitioning during seedling establishment. *Ecology* **94**, 780-786 (2013).

165 Birnbaum, C. & Leishman, M. R. Plant-soil feedbacks do not explain invasion success of *Acacia* species in introduced range populations in Australia. *Biol. Invasions* **15**, 2609-2625 (2013).

166 Brandt, A. J., de Kroon, H., Reynolds, H. L. & Burns, J. H. Soil heterogeneity generated by plant-soil feedbacks has implications for species recruitment and coexistence. *J. Ecol.* **101**, 277-286 (2013).

167 Morriën, E. & van der Putten, W. H. Soil microbial community structure of range-expanding plant species differs from co-occurring natives. *J. Ecol.* **101**, 1093-1102 (2013).

168 Deck, A., Muir, A. & Strauss, S. Transgenerational soil-mediated differences between plants experienced or naive to a grass invasion. *Ecol. Evol.* **3**, 3663-3671 (2013).

169 Hol, W. H. G., de Boer, W., ten Hooven, F. & van der Putten, W. H. Competition increases sensitivity of wheat (*Triticum aestivum*) to biotic plant-soil feedback. *Plos One* **8**, e66085 (2013).

170 Hawkes, C. V., Kivlin, S. N., Du, J. & Eviner, V. T. The temporal development and additivity of plant-soil feedback in perennial grasses. *Plant Soil* **369**, 141-150 (2013).

171 Bakker, M. G., Otto-Hanson, L., Lange, A. J., Bradeen, J. M. & Kinkel, L. L. Plant monocultures produce more antagonistic soil *Streptomyces* communities than high-diversity plant communities. *Soil Biol. Biochem.* **65**, 304-312 (2013).

172 Schittko, C. & Wurst, S. Above- and belowground effects of plant-soil feedback from exotic *Solidago canadensis* on native *Tanacetum vulgare*. *Biol. Invasions* **16**, 1465-1479 (2014).

173 Lou, Y. *et al.* An affinity-effect relationship for microbial communities in plant-soil feedback loops. *Microb. Ecol.* **67**, 866-876 (2014).

174 Perkins, L. B. & Hatfield, G. Competition, legacy, and priority and the success of three invasive species. *Biol. Invasions* **16**, 2543-2550 (2014).

175 Brandt, A. J., del Pino, G. A. & Burns, J. H. Experimental protocol for manipulating plant-induced soil heterogeneity. *J. Vis. Exp.* **13**, 51580 (2014).

176 Burns, J. H. & Brandt, A. J. Heterogeneity in plant-soil feedbacks and resident population dynamics affect mutual invasibility. *J. Ecol.* **102**, 1048-1057 (2014).

177 Gehring, C. A., Ji, B., Fong, S. & Whitham, T. G. Hybridization in *Populus* alters the species composition and interactions of root-colonizing fungi: consequences for host plant performance. *Botany* **92**, 287-293 (2014).

178 Maron, J. L., Klironomos, J., Waller, L. & Callaway, R. M. Invasive plants escape from suppressive soil biota at regional scales. *J. Ecol.* **102**, 19-27 (2014).

179 Anacker, B. L., Klironomos, J. N., Maherali, H., Reinhart, K. O. & Strauss, S. Y. Phylogenetic conservatism in plant-soil feedback and its implications for plant abundance. *Ecol. Lett.* **17**, 1613-1621 (2014).

180 Sun, B., Wang, P. & Kong, C.-H. Plant-soil feedback in the interference of allelopathic rice with barnyardgrass. *Plant Soil* **377**, 309-321 (2014).

181 Lankau, E. W. & Lankau, R. A. Plant species capacity to drive soil fungal communities contributes to differential impacts of plant-soil legacies. *Ecology* **95**, 3221-3228 (2014).

182 Baxendale, C., Orwin, K. H., Poly, F., Pommier, T. & Bardgett, R. D. Are plant-soil feedback responses explained by plant traits? *New Phytol.* **204**, 408-423 (2014).

183 Zhang, S. *et al.* Autotoxicity as a cause for natural regeneration failure in *Nyssa yunnanensis* and its implications for conservation. *Isr. J. Plant Sci.* **62**, 187-197 (2015).

184 Larios, L. & Suding, K. N. Competition and soil resource environment alter plant-soil feedbacks for native and exotic grasses. *Aob Plants* **7**, plu077 (2015).

185 Kos, M., Bukovinszky, T., Mulder, P. P. J. & Bezemer, T. M. Disentangling above- and belowground neighbor effects on the growth, chemistry, and arthropod community on a focal plant. *Ecology* **96**, 164-175 (2015).

186 Maron, J. L., Luo, W., Callaway, R. M. & Pal, R. W. Do exotic plants lose resistance to pathogenic soil biota from their native range? A test with *Solidago gigantea Oecologia* **179**, 447-454 (2015).

187 Sanderson, L. A., Day, N. J. & Antunes, P. M. Edaphic factors and feedback do not limit range expansion of an exotic invasive plant. *Plant Ecol.* **216**, 133-141 (2015).

188 Smith, L. M. & Reynolds, H. L. *Euonymus fortunei* dominance over native species may be facilitated by plant-soil feedback. *Plant Ecol.* **216**, 1401-1406 (2015).

189 Miller, Z. J. & Menalled, F. D. Impact of species identity and phylogenetic relatedness on biologically-mediated plant-soil feedbacks in a low and a high intensity agroecosystem. *Plant Soil* **389**, 171-183 (2015).

190 Münzbergová, Z. & Surinová, M. The importance of species phylogenetic relationships and species traits for the intensity of plant-soil feedback. *Ecosphere* **6**, 1-16 (2015).

191 Jing, J., Bezemer, T. M. & van der Putten, W. H. Interspecific competition of early successional plant species in ex-arable fields as influenced by plant-soil feedback. *Basic Appl. Ecol.* **16**, 112-119 (2015).

192 Wagg, C., Boller, B., Schneider, S., Widmer, F. & van der Heijden, M. G. A. Intraspecific and intergenerational differences in plant-soil feedbacks. *Oikos* **124**, 994-1004 (2015).

193 del Pino, G. A., Brandt, A. J. & Burns, J. H. Light heterogeneity interacts with plant-induced soil heterogeneity to affect plant trait expression. *Plant Ecol.* **216**, 439-450 (2015).

194 Orozco-Aceves, M., Standish, R. J. & Tibbett, M. Long-term conditioning of soil by plantation eucalypts and pines does not affect growth of the native jarrah tree. *For. Ecol. Manag.* **338**, 92-99 (2015).

195 Chiuffo, M. C., Macdougall, A. S. & Hierro, J. L. Native and non-native ruderals experience similar plant-soil feedbacks and neighbor effects in a system where they coexist. *Oecologia* **179**, 843-852 (2015).

196 Kos, M., Tuijl, M. A. B., de Roo, J., Mulder, P. P. J. & Bezemer, T. M. Plant-soil feedback effects on plant quality and performance of an aboveground herbivore interact with fertilisation. *Oikos* **124**, 658-667 (2015).

197 Hilbig, B. E. & Allen, E. B. Plant-soil feedbacks and competitive interactions between invasive *Bromus diandrus* and native forb species. *Plant Soil* **392**, 191-203 (2015).

198 Bauer, J. T., Mack, K. M. L. & Bever, J. D. Plant-soil feedbacks as drivers of succession: evidence from remnant and restored tallgrass prairies. *Ecosphere* **6**, 1-12 (2015).

199 Li, J. H., Zhang, H., Li, W. J. & Knops, J. M. H. Plant-soil feedbacks in a sub-alpine meadow ecosystem with high plant diversity on the Qinghai-Tibetan Plateau. *Plant Ecol.* **216**, 1659-1674 (2015).

200 Smith, L. M. & Reynolds, H. L. Plant-soil feedbacks shift from negative to positive with decreasing light in forest understory species. *Ecology* **96**, 2523-2532 (2015).

201 Hendriks, M. *et al.* Root responses of grassland species to spatial heterogeneity of plant-soil feedback. *Funct. Ecol.* **29**, 177-186 (2015).

202 Orozco-Aceves, M., Standish, R. J. & Tibbett, M. Soil conditioning and plant-soil feedbacks in a modified forest ecosystem are soil-context dependent. *Plant Soil* **390**, 183-194 (2015).

203 Hendriks, M. *et al.* Spatial heterogeneity of plant-soil feedback affects root interactions and interspecific competition. *New Phytol.* **207**, 830-840 (2015).

204 Speek, T. A. A. *et al.* The role of below-ground processes in mediating plant invasions local dominance of exotic plants declines with residence time: a role for plant-soil feedback? *Aob Plants* **7**, plv021 (2015).

205 Kos, M., Tuijl, M. A. B., de Roo, J., Mulder, P. P. J. & Bezemer, T. M. Species-specific plant-soil feedback effects on above-ground plant-insect interactions. *J. Ecol.* **103**, 904-914 (2015).

206 Dieng, A., Duponnois, R., Ndoye, I. & Baudoin, E. Cultivation of *Jatropha curcas* L. leads to pronounced mycorrhizal community differences. *Soil Biol. Biochem.* **89**, 1-11 (2015).

207 Jing, J. Y., Bezemer, T. M. & van der Putten, W. H. Complementarity and selection effects in early and mid-successional plant communities are differentially affected by plant-soil feedback. *J. Ecol.* **103**, 641-647 (2015).

208 Liao, H. X., Luo, W. B., Peng, S. L. & Callaway, R. M. Plant diversity, soil biota and resistance to exotic invasion. *Divers. Distrib.* **21**, 826-835 (2015).

209 Liang, M. X. *et al.* Adult trees cause density-dependent mortality in conspecific seedlings by regulating the frequency of pathogenic soil fungi. *Ecol. Lett.* **19**, 1448-1456 (2016).

210 Hemrová, L., Knappová, J. & Münzbergová, Z. Assessment of habitat suitability is affected by plant-soil feedback: comparison of field and garden experiment. *Plos One* **11**, e0157800 (2016).

211 Perkins, L. B. & Hatfield, G. Can commercial soil microbial treatments remediate plant-soil feedbacks to improve restoration seedling performance? *Restor. Ecol.* **24**, 194-201 (2016).

212 Corrales, A., Mangan, S. A., Turner, B. L. & Dalling, J. W. An ectomycorrhizal nitrogen economy facilitates monodominance in a neotropical forest. *Ecol. Lett.* **19**, 383-392 (2016).

213 Zhang, N. L., Van der Putten, W. H. & Veen, G. F. Effects of root decomposition on plant-soil feedback of early- and mid-successional plant species. *New Phytol.* **212**, 220-231 (2016).

214 Wubs, E. R. J. & Bezemer, T. M. Effects of spatial plant-soil feedback heterogeneity on plant performance in monocultures. *J. Ecol.* **104**, 364-376 (2016).

215 Valliere, J. M. & Allen, E. B. Interactive effects of nitrogen deposition and drought-stress on plant-soil feedbacks of *Artemisia californica* seedlings. *Plant Soil* **403**, 277-290 (2016).

216 Bergmann, J. *et al.* The interplay between soil structure, roots, and microbiota as a determinant of plant-soil feedback. *Ecol. Evol.* **6**, 7633-7644 (2016).

217 Perkins, L. B., Hatfield, G. & Espeland, E. K. Invasive grasses consistently create similar plant-soil feedback types in soils collected from geographically distant locations. *J. Plant Ecol.* **9**, 180-186 (2016).

218 Maron, J. L., Smith, A. L., Ortega, Y. K., Pearson, D. E. & Callaway, R. M. Negative plant-soil feedbacks increase with plant abundance, and are unchanged by competition. *Ecology* **97**, 2055-2063 (2016).

219 Valliere, J. M. & Allen, E. B. Nitrogen enrichment contributes to positive responses to soil microbial communities in three invasive plant species. *Biol. Invasions* **18**, 2349-2364 (2016).

220 Schittko, C., Runge, C., Strupp, M., Wolff, S. & Wurst, S. No evidence that plant-soil feedback effects of native and invasive plant species under glasshouse conditions are reflected in the field. *J. Ecol.* **104**, 1243-1249 (2016).

221 Rutten, G., Prati, D., Hemp, A. & Fischer, M. Plant-soil feedback in East-African savanna trees. *Ecology* **97**, 294-301 (2016).

222 Dostálek, T., Münzbergová, Z., Kladivová, A. & Macel, M. Plant-soil feedback in native *vs*. invasive populations of a range expanding plant. *Plant Soil* **399**, 209-220 (2016).

223 Nagendra, U. J. & Peterson, C. J. Plant-soil feedbacks differ in intact and tornado-damaged areas of the southern Appalachian mountains, USA. *Plant Soil* **402**, 103-116 (2016).

224 Chung, Y. A. & Rudgers, J. A. Plant-soil feedbacks promote negative frequency dependence in the coexistence of two aridland grasses. *Proc. R. Soc. B: Biol. Sci.* **283**, 20160608 (2016).

225 Cortois, R., Schroeder-Georgi, T., Weigelt, A., van der Putten, W. H. & De Deyn, G. B. Plant-soil feedbacks: role of plant functional group and plant traits. *J. Ecol.* **104**, 1608-1617 (2016).

226 Pattison, Z., Rumble, H., Tanner, R. A., Jin, L. & Gange, A. C. Positive plant-soil feedbacks of the invasive *Impatiens glandulifera* and their effects on above-ground microbial communities. *Weed Res.* **56**, 198-207 (2016).

227 Otfinowski, R., Kenkel, N. C. & Tenuta, M. Reduced vigor of a clonal invader: lack of evidence for soilborne pathogens. *Appl. Soil Ecol.* **98**, 75-82 (2016).

228 Castle, S. C., Lekberg, Y., Affleck, D. & Cleveland, C. C. Soil abiotic and biotic controls on plant performance during primary succession in a glacial landscape. *J. Ecol.* **104**, 1555-1565 (2016).

229 Rigg, J. L. *et al.* Soil microbial communities influence seedling growth of a rare conifer independent of plant-soil feedback. *Ecology* **97**, 3346-3358 (2016).

230 Kulmatiski, A., Beard, K. H., Grenzer, J., Forero, L. & Heavilin, J. Using plant-soil feedbacks to predict plant biomass in diverse communities. *Ecology* **97**, 2064-2073 (2016).

231 Rigg, J. L. *et al.* Variation in soil microbial communities associated with critically endangered Wollemi pine affects fungal, but not bacterial, assembly within seedling roots. *Pedobiologia* **59**, 61-71 (2016).

232 Xia, Z.-C., Kong, C.-H., Chen, L.-C., Wang, P. & Wang, S.-L. A broadleaf species enhances an autotoxic conifers growth through belowground chemical interactions. *Ecology* **97**, 2283-2292 (2016).

233 Kuebbing, S. E., Patterson, C. M., Classen, A. T. & Simberloff, D. Co-occurring nonnative woody shrubs have additive and non-additive soil legacies. *Ecol. Appl.* **26**, 1896-1906 (2016).

234 Zuppinger-Dingley, D., Flynn, D. F. B., De Deyn, G. B., Petermann, J. S. & Schmid, B. Plant selection and soil legacy enhance long-term biodiversity effects. *Ecology* **97**, 918-928 (2016).

235 García-Parisi, P. A. & Omacini, M. Arbuscular mycorrhizal fungi can shift plant-soil feedback of grass-endophyte symbiosis from negative to positive. *Plant Soil* **419**, 13-23 (2017).

236 Mummey, D. L. & Ramsey, P. W. Can sainfoin improve conditions for establishment of native forbs in crested wheatgrass stands? *Ecol. Restor.* **35**, 127-137 (2017).

237 Orozco-Aceves, M., Tibbett, M. & Standish, R. J. Correlation between soil development and native plant growth in forest restoration after surface mining. *Ecol. Eng.* **106**, 209-218 (2017).

238 Aguilera, A. G. *et al.* Effect of plant-soil feedbacks on the growth and competition of *Lactuca* species. *Plant Ecol.* **218**, 359-372 (2017).

239 Bauer, J. T., Blumenthal, N., Miller, A. J., Ferguson, J. K. & Reynolds, H. L. Effects of between-site variation in soil microbial communities and plant-soil feedbacks on the productivity and composition of plant communities. *J. Appl. Ecol.* **54**, 1028-1039 (2017).

240 Pizano, C., Mangan, S. A., Graham, J. H. & Kitajima, K. Host-specific effects of soil microbial filtrates prevail over those of arbuscular mycorrhizae in a fragmented landscape. *Ecol. Appl.* **27**, 1946-1957 (2017).

241 Kulmatiski, A. *et al.* Live long and prosper: plant-soil feedback, lifespan, and landscape abundance covary. *Ecology* **98**, 3063-3073 (2017).

242 Stanescu, S. & Maherali, H. Mycorrhizal feedback is not associated with the outcome of competition in old-field perennial plants. *Oikos* **126**, 248-258 (2017).

243 Whitaker, B. K., Bauer, J. T., Bever, J. D. & Clay, K. Negative plant-phyllosphere feedbacks in native Asteraceae hosts-a novel extension of the plant-soil feedback framework. *Ecol. Lett.* **20**, 1064-1073 (2017).

244 Fitzpatrick, C. R., Gehant, L., Kotanen, P. M. & Johnson, M. T. J. Phylogenetic relatedness, phenotypic similarity and plant-soil feedbacks. *J. Ecol.* **105**, 786-800 (2017).

245 Sweet, D. D. & Burns, J. H. Plant performance was greater in the soils of more distantly related plants for an herbaceous understory species. *Aob Plants* **9**, plx005 (2017).

246 Bennett, J. A. *et al.* Plant-soil feedbacks and mycorrhizal type influence temperate forest population dynamics. *Science* **355**, 181-184 (2017).

247 Gómez-Aparicio, L. *et al.* Plant-soil feedbacks in declining forests: implications for species coexistence. *Ecology* **98**, 1908-1921 (2017).

248 Crocker, E. V., Nelson, E. B. & Blossey, B. Soil conditioning effects of *Phragmites australis* on native wetland plant seedling survival. *Ecol. Evol.* **7**, 5571-5579 (2017).

249 Meiners, S. J., Phipps, K. K., Pendergast, T. H., Canam, T. & Carson, W. P. Soil microbial communities alter leaf chemistry and influence allelopathic potential among coexisting plant species. *Oecologia* **183**, 1155-1165 (2017).

250 Kannenberg, S. A. & Phillips, R. P. Soil microbial communities buffer physiological responses to drought stress in three hardwood species. *Oecologia* **183**, 631-641 (2017).

251 Burns, J. H., Brandt, A. J., Murphy, J. E., Kaczowka, A. M. & Burke, D. J. Spatial heterogeneity of plant-soil feedbacks increases per capita reproductive biomass of species at an establishment disadvantage. *Oecologia* **183**, 1077-1086 (2017).

252 Mursinoff, S. & Tack, A. J. M. Spatial variation in soil biota mediates plant adaptation to a foliar pathogen. *New Phytol.* **214**, 644-654 (2017).

253 García-Parisi, P. A., Lattanzi, F. A., Grimoldi, A. A., Druille, M. & Omacini, M. Three symbionts involved in interspecific plant-soil feedback: epichloid endophytes and mycorrhizal fungi affect the performance of rhizobia-legume symbiosis. *Plant Soil* **412**, 151-162 (2017).

254 Gehring, C. A., Sthultz, C. M., Flores-Renteria, L., Whipple, A. V. & Whitham, T. G. Tree genetics defines fungal partner communities that may confer drought tolerance. *Proc. Natl. Acad. Sci. USA* **114**, 11169-11174 (2017).

255 Johnson, S. P., Miller, Z. J., Lehnhoff, E. A., Miller, P. R. & Menalled, F. D. Cropping systems modify soil biota effects on wheat (*Triticum aestivum*) growth and competitive ability. *Weed Res.* **57**, 6-15 (2017).

256 Ma, H.-K., Pineda, A., van der Wurff, A. W. G., Raaijmakers, C. & Bezemer, T. M. Plant-soil feedback effects on growth, defense and susceptibility to a soil-borne disease in a cut flower crop: species and functional group effects. *Front. Plant Sci.* **8**, 2127 (2017).

257 Vink, S. N. *et al.* Soil conditioning affects interactions between native and invasive exotic perennials of semi-natural grasslands. *J. Appl. Ecol.* **54**, 1526-1533 (2017).

258 Feitosa de Souza, T. A., de Andrade, L. A., Freitas, H. & Sandim, A. d. S. Biological invasion influences the outcome of plant-soil feedback in the Invasive plant species from the Brazilian semi-arid. *Microb. Ecol.* **76**, 102-112 (2018).

259 Ma, H.-k., Pineda, A., van der Wurff, A. W. G. & Bezemer, T. M. Carry-over effects of soil inoculation on plant growth and health under sequential exposure to soil-borne diseases. *Plant Soil* **433**, 257-270 (2018).

260 Zhao, N. X. *et al.* Competition alters plant-soil feedbacks of two species in the Inner Mongolia Steppe, China. *Plant Soil* **429**, 425-436 (2018).

261 Fry, E. L. *et al.* Drought neutralises plant-soil feedback of two mesic grassland forbs. *Oecologia* **186**, 1113-1125 (2018).

262 Lepinay, C., Vondráková, Z., Dostálek, T. & Münzbergová, Z. Duration of the conditioning phase affects the results of plant-soil feedback experiments via soil chemical properties. *Oecologia* **186**, 459-470 (2018).

263 Hahn, P. G. *et al.* Effects of short- and long-term variation in resource conditions on soil fungal communities and plant responses to soil biota. *Front. Plant Sci.* **9**, 1605 (2018).

264 Semchenko, M. *et al.* Fungal diversity regulates plant-soil feedbacks in temperate grassland. *Sci. Adv.* **4**, eaau4578 (2018).

265 Helander, M. *et al.* Glyphosate decreases mycorrhizal colonization and affects plant-soil feedback. *Sci. Total Environ.* **642**, 285-291 (2018).

266 Vukicevich, E., Lowery, D. T., Urbez-Torres, J. R., Bowen, P. & Hart, M. Groundcover management changes grapevine root fungal communities and plant-soil feedback. *Plant Soil* **424**, 419-433 (2018).

267 Khudr, M. S., Purkiss, S. A. & Hager, R. Indirect ecological effects interact with community genetic effects in a host-parasite system and dramatically reduce parasite burden. *Proc. R. Soc. B: Biol. Sci.* **285**, 20180891 (2018).

268 McGinn, K. J. *et al.* The influence of residence time and geographic extent on the strength of plant-soil feedbacks for naturalised Trifolium. *J. Ecol.* **106**, 207-217 (2018).

269 Florianová, A. & Münzbergová, Z. The intensity of intraspecific plant-soil feedbacks in alien *Impatiens* species depends on the environment. *Perspect. Plant Ecol. Evol. Syst.* **32**, 56-64 (2018).

270 Allen, W. J., Meyerson, L. A., Flick, A. J. & Cronin, J. T. Intraspecific variation in indirect plant-soil feedbacks influences a wetland plant invasion. *Ecology* **99**, 1430-1440 (2018).

271 Vaello, T., Sarde, S. J., Angeles Marcos-Garcia, M., de Boer, J. G. & Pineda, A. Modulation of plant-mediated interactions between herbivores of different feeding guilds: effects of parasitism and belowground interactions. *Sci. Rep.* **8**, 14424 (2018).

272 Senior, J. K. *et al.* Phylogenetic trait conservatism predicts patterns of plant-soil feedback. *Ecosphere* **9**, e02409 (2018).

273 Wuest, S. E. & Niklaus, P. A. A plant biodiversity effect resolved to a single chromosomal region. *Nat. Ecol. Evol.* **2**, 1933-1939 (2018).

274 Heinen, R., van der Sluijs, M., Biere, A., Harvey, J. A. & Bezemer, T. M. Plant community composition but not plant traits determine the outcome of soil legacy effects on plants and insects. *J. Ecol.* **106**, 1217-1229 (2018).

275 Bezemer, T. M., Jing, J. J., Bakx-Schotman, J. M. T. & Bijleveld, E. J. Plant competition alters the temporal dynamics of plant-soil feedbacks. *J. Ecol.* **106**, 2287-2300 (2018).

276 Xi, N. X., Chu, C. J. & Bloor, J. M. G. Plant drought resistance is mediated by soil microbial community structure and soil-plant feedbacks in a savanna tree species. *Environ. Exp. Bot.* **155**, 695-701 (2018).

277 Kempel, A., Rindisbacher, A., Fischer, M. & Allan, E. Plant soil feedback strength in relation to large-scale plant rarity and phylogenetic relatedness. *Ecology* **99**, 597-606 (2018).

278 Ba, L., Facelli, E. & Facelli, J. M. Plant-mycorrhizal fungi feedbacks: potential accomplices of *Avena barbata*'s high invasiveness. *Plant Ecol.* **219**, 1045-1052 (2018).

279 Heinze, J. & Joshi, J. Plant-soil feedback effects can be masked by aboveground herbivory under natural field conditions. *Oecologia* **186**, 235-246 (2018).

280 Rutten, G. & Gómez-Aparicio, L. Plant-soil feedbacks and root responses of two Mediterranean oaks along a precipitation gradient. *Plant Soil* **424**, 221-231 (2018).

281 Lankau, R. A. & Keymer, D. P. Simultaneous adaptation and maladaptation of tree populations to local rhizosphere microbial communities at different taxonomic scales. *New Phytol.* **217**, 1267-1278 (2018).

282 Wooliver, R. C. *et al.* Soil fungi underlie a phylogenetic pattern in plant growth responses to nitrogen enrichment. *J. Ecol.* **106**, 2161-2175 (2018).

283 Kutáková, E., Cesarz, S., Münzbergová, Z. & Eisenhauer, N. Soil microarthropods alter the outcome of plant-soil feedback experiments. *Sci. Rep.* **8**, 11898 (2018).

284 Luo, S., Schmid, B., De Deyn, G. B. & Yu, S. X. Soil microbes promote complementarity effects among co-existing trees through soil nitrogen partitioning. *Funct. Ecol.* **32**, 1879-1889 (2018).

285 Xue, W., Berendse, F. & Bezemer, T. M. Spatial heterogeneity in plant-soil feedbacks alters competitive interactions between two grassland plant species. *Funct. Ecol.* **32**, 2085-2094 (2018).

286 Saar, S., Semchenko, M., Barel, J. M. & De Deyn, G. B. Spatial heterogeneity in root litter and soil legacies differentially affect legume root traits. *Plant Soil* **428**, 253-264 (2018).

287 Zhu, F. *et al.* Species-specific plant-soil feedbacks alter herbivore-induced gene expression and defense chemistry in *Plantago lanceolata*. *Oecologia* **188**, 801-811 (2018).

288 Bukowski, A. R., Schittko, C. & Petermann, J. S. The strength of negative plant-soil feedback increases from the intraspecific to the interspecific and the functional group level. *Ecol. Evol.* **8**, 2280-2289 (2018).

289 Ma, H.-k., Pineda, A., van der Wurff, A. W. G. & Bezemer, T. M. Synergistic and antagonistic effects of mixing monospecific soils on plant-soil feedbacks. *Plant Soil* **429**, 271-279 (2018).

290 Wubs, E. R. J. & Bezemer, T. M. Temporal carry-over effects in sequential plant-soil feedbacks. *Oikos* **127**, 220-229 (2018).

291 Hu, L. *et al.* Root exudate metabolites drive plant-soil feedbacks on growth and defense by shaping the rhizosphere microbiota. *Nat. Commun.* **9**, 2738 (2018).

292 Ingerslew, K. S. & Kaplan, I. Distantly related crops are not better rotation partners for tomato. *J. Appl. Ecol.* **55**, 2506-2516 (2018).

293 Xue, W., Bezemer, T. M. & Berendse, F. Density-dependency and plant-soil feedback: former plant abundance influences competitive interactions between two grassland plant species through plant-soil feedbacks. *Plant Soil* **428**, 441-452 (2018).

294 Siefert, A., Zillig, K. W., Friesen, M. L. & Strauss, S. Y. Soil microbial communities alter conspecific and congeneric competition consistent with patterns of field coexistence in three *Trifolium* congeners. *J. Ecol.* **106**, 1876-1891 (2018).

295 Kadowaki, K. *et al.* Mycorrhizal fungi mediate the direction and strength of plant-soil feedbacks differently between arbuscular mycorrhizal and ectomycorrhizal communities. *Commun. Biol.* **1**, 196 (2018).

296 Wubs, E. R. J. & Bezemer, T. M. Plant community evenness responds to spatial plant-soil feedback heterogeneity primarily through the diversity of soil conditioning. *Funct. Ecol.* **32**, 509-521 (2018).

297 Dudenhöffer, J. H., Ebeling, A., Klein, A. M. & Wagg, C. Beyond biomass: soil feedbacks are transient over plant life stages and alter fitness. *J. Ecol.* **106**, 230-241 (2018).

298 Png, G. K. *et al.* Biotic and abiotic plant-soil feedback depends on nitrogen-acquisition strategy and shifts during long-term ecosystem development. *J. Ecol.* **107**, 142-153 (2019).

299 Dierks, J., Denef, K., van Diepen, L. T. A. & de Graaff, M.-A. Cheatgrass-associated AMF community negatively affects sagebrush root production but not C transfer to the soil. *Plant Soil* **436**, 381-396 (2019).

300 Duell, E. B., Zaiger, K., Bever, J. D. & Wilson, G. W. T. Climate affects plant-soil feedback of native and invasive grasses: negative feedbacks in stable but not in variable environments. *Front. Ecol. Evol.* **7**, 419 (2019).

301 Aldorfova, A. & Munzbergova, Z. Conditions of plant cultivation affect the differences in intraspecific plant-soil feedback between invasive and native dominants. *Flora* **261**, 151492 (2019).

302 Chung, Y. A., Collins, S. L. & Rudgers, J. A. Connecting plant-soil feedbacks to long-term stability in a desert grassland. *Ecology* **100**, e02756 (2019).

303 Xi, N. X., Bloor, J. M. G., Wang, Y. & Chu, C. J. Contribution of conspecific soil microorganisms to tree seedling light responses: insights from two tropical species with contrasting shade tolerance. *Environ. Exp. Bot.* **166**, 103826 (2019).

304 Eck, J. L., Stump, S. M., Delavaux, C. S., Mangan, S. A. & Comita, L. S. Evidence of within-species specialization by soil microbes and the implications for plant community diversity. *Proc. Natl. Acad. Sci. USA* **116**, 7371-7376 (2019).

305 Dostal, P., Tasevova, K. & Klinerova, T. Linking species abundance and overyielding from experimental communities with niche and fitness characteristics. *J. Ecol.* **107**, 178-189 (2019).

306 Rekret, P. & Maherali, H. Local adaptation to mycorrhizal fungi in geographically close *Lobelia siphilitica* populations. *Oecologia* **190**, 127-138 (2019).

307 Luo, L. *et al.* Negative plant-soil feedback driven by re-assemblage of the rhizosphere microbiome with the growth of *Panax notoginseng*. *Front. Microbiol.* **10**, 1597 (2019).

308 Pizano, C., Kitajima, K., Graham, J. H. & Mangan, S. A. Negative plant-soil feedbacks are stronger in agricultural habitats than in forest fragments in the tropical Andes. *Ecology* **100**, e02850 (2019).

309 Duhamel, M. *et al.* Plant selection initiates alternative successional trajectories in the soil microbial community after disturbance. *Ecol. Monogr.* **89**, e01367 (2019).

310 Miller, E. C., Perron, G. G. & Collins, C. D. Plant-driven changes in soil microbial communities influence seed germination through negative feedbacks. *Ecol. Evol.* **9**, 9298-9311 (2019).

311 Feitosa de Souza, T. A., Santos, D., de Andrade, L. A. & Freitas, H. Plant-soil feedback of two legume species in semi-arid Brazil. *Braz. J. Microbiol.* **50**, 1011-1020 (2019).

312 Ma, S. *et al.* Plant-soil feedbacks of forest understorey plants transplanted in nonlocal soils along a latitudinal gradient. *Plant Biol.* **21**, 677-687 (2019).

313 Kirchhoff, L. *et al.* Plant-soil feedbacks of plantago lanceolata in the field depend on plant origin and herbivory. *Front. Ecol. Evol.* **7**, 422 (2019).

314 Kulmatiski, A. Plant-soil feedbacks predict native but not non-native plant community composition: a 7-year common-garden experiment. *Front. Ecol. Evol.* **7**, 326 (2019).

315 Fang, K. *et al.* Plant-soil-foliage feedbacks on seed germination and seedling growth of the invasive plant *Ageratina adenophora*. *Proc. R. Soc. B: Biol. Sci.* **286**, 20191520 (2019).

316 Snyder, A. E. & Harmon-Threatt, A. N. Reduced water-availability lowers the strength of negative plant-soil feedbacks of two *Asclepias* species. *Oecologia* **190**, 425-432 (2019).

317 Wang, M. *et al.* Removal of soil biota alters soil feedback effects on plant growth and defense chemistry. *New Phytol.* **221**, 1478-1491 (2019).

318 Wilschut, R. A. *et al.* Root traits and belowground herbivores relate to plant-soil feedback variation among congeners. *Nat. Commun.* **10**, 1564 (2019).

319 McCarthy-Neumann, S. & Kobe, R. K. Site soil-fertility and light availability influence plant-soil feedback. *Front. Ecol. Evol.* **7**, 383 (2019).

320 Lozano, Y. M., Hortal, S., Armas, C. & Pugnaire, F. I. Soil micro-organisms and competitive ability of a tussock grass species in a dry ecosystem. *J. Ecol.* **107**, 1215-1225 (2019).

321 Yang, M. *et al.* Steaming combined with biochar application eliminates negative plant-soil feedback for sanqi cultivation. *Soil tillage res.* **189**, 189-198 (2019).

322 Carrillo, J., Ingwell, L. L., Li, X. & Kaplan, I. Domesticated tomatoes are more vulnerable to negative plant-soil feedbacks than their wild relatives. *J. Ecol.* **107**, 1753-1766 (2019).

323 Edwards, J. *et al.* Soil domestication by rice cultivation results in plant-soil feedback through shifts in soil microbiota. *Genome Biol.* **20**, 221 (2019).

324 Seipel, T., Ishaq, S. L. & Menalled, F. D. Agroecosystem resilience is modified by management system via plant-soil feedbacks. *Basic Appl. Ecol.* **39**, 1-9 (2019).

325 Wang, X.-X., Hoffland, E., Mommer, L., Feng, G. & Kuyper, T. W. Maize varieties can strengthen positive plant-soil feedback through beneficial arbuscular mycorrhizal fungal mutualists. *Mycorrhiza* **29**, 251-261 (2019).

326 in ’t Zandt, D., van den Brink, A., de Kroon, H. & Visser, E. J. W. Plant-soil feedback is shut down when nutrients come to town. *Plant Soil* **439**, 541-551 (2019).

327 Heinze, J. *et al.* The relative importance of plant-soil feedbacks for plant-species performance increases with decreasing intensity of herbivory. *Oecologia* **190**, 651-664 (2019).

328 Yang, B. *et al.* Parasitism changes rhizospheric soil microbial communities of invasive *Alternanthera philoxeroides*, benefitting the growth of neighboring plants. *Appl. Soil Ecol.* **143**, 1-9 (2019).

329 Li, C.-X. *et al.* Treatment with wheat root exudates and soil microorganisms from wheat/watermelon companion cropping can induce watermelon disease resistance against *Fusarium oxysporum* f. sp. *niveum*. *Plant Dis.* **103**, 1693-1702 (2019).

330 Wubs, E. R. J., van Heusden, T., Melchers, P. D. & Bezemer, T. M. Soil inoculation steers plant-soil feedback, suppressing ruderal plant species. *Front. Ecol. Evol.* **7**, 451 (2019).

331 Ristok, C. *et al.* Plant species richness elicits changes in the metabolome of grassland species via soil biotic legacy. *J. Ecol.* **107**, 2240-2254 (2019).

332 Koziol, L. & Bever, J. D. Mycorrhizal feedbacks generate positive frequency dependence accelerating grassland succession. *J. Ecol.* **107**, 622-632 (2019).

333 Huberty, M., Choi, Y. H., Heinen, R. & Bezemer, T. M. Above-ground plant metabolomic responses to plant-soil feedbacks and herbivory. *J. Ecol.* **108**, 1703-1712 (2020).

334 Dieskau, J., Bruelheide, H., Gutknecht, J. & Erfmeier, A. Biogeographic differences in plant-soil biota relationships contribute to the exotic range expansion of *Verbascum thapsus*. *Ecol. Evol.* **10**, 13057-13070 (2020).

335 Pineda, A., Kaplan, I., Hannula, S. E., Ghanem, W. & Bezemer, T. M. Conditioning the soil microbiome through plant-soil feedbacks suppresses an aboveground insect pest. *New Phytol.* **226**, 595-608 (2020).

336 Segnitz, R. M., Russo, S. E., Davies, S. J. & Peay, K. G. Ectomycorrhizal fungi drive positive phylogenetic plant-soil feedbacks in a regionally dominant tropical plant family. *Ecology* **101**, e03083 (2020).

337 Impastato, C. J. & Carrington, M. E. Effects of plant species and soil history on root morphology, arbuscular mycorrhizal colonization of roots, and biomass in four tallgrass prairie species. *Plant Ecol.* **221**, 117-124 (2020).

338 Fu, J. *et al.* Effects of shade stress on turfgrasses morphophysiology and rhizosphere soil bacterial communities. *BMC Plant Biol.* **20**, 92 (2020).

339 Lucero, J. E. *et al.* Escape from natural enemies depends on the enemies, the invader, and competition. *Ecol. Evol.* **10**, 10818-10828 (2020).

340 Kutakova, E., Meszarosova, L., Baldrian, P. & Munzbergova, Z. Evaluating the role of biotic and chemical components of plant-soil feedback of primary successional plants. *Biol. Fertil. Soils* **56**, 345-358 (2020).

341 Chen, E., Blaze, J. A., Smith, R. S., Peng, S. & Byers, J. E. Freeze tolerance of poleward-spreading mangrove species weakened by soil properties of resident salt marsh competitor. *J. Ecol.* **108**, 1725-1737 (2020).

342 Garrett, E. M. & Gibson, D. J. Identifying sustainable grassland management approaches in response to the Invasive legume *Lespedeza cuneata*: A functional group approach. *Sustainability* **12**, 5951 (2020).

343 Lance, A. C., Carrino-Kyker, S. R., Burke, D. J. & Burns, J. H. Individual plant-soil feedback effects influence tree growth and rhizosphere fungal communities in a temperate forest restoration experiment. *Front. Ecol. Evol.* **7**, 500 (2020).

344 Peacher, M. D. & Meiners, S. J. Inoculum handling alters the strength and direction of plant-microbe interactions. *Ecology* **101**, e02994 (2020).

345 Oschrin, E. & Reynolds, H. L. Interpreting pattern in plant-soil feedback experiments with co-occurring invasive species: a graphical framework and case study. *Diversity-Basel* **12**, 201 (2020).

346 Komatsu, K. J. & Simms, E. L. Invasive legume management strategies differentially impact mutualist abundance and benefit to native and invasive hosts. *Restor. Ecol.* **28**, 378-386 (2020).

347 Zandt, D. I. t. *et al.* Local soil legacy effects in a multispecies grassland community are underlain by root foraging and soil nutrient availability. *J. Ecol.* **108**, 2243-2255 (2020).

348 Wei, W. *et al.* Mixed evidence for plant-soil feedbacks in forest invasions. *Oecologia* **193**, 665-676 (2020).

349 Phillips, M. L., Aronson, E. L., Maltz, M. R. & Allen, E. B. Native and invasive inoculation sources modify fungal community assembly and biomass production of a chaparral shrub. *Appl. Soil Ecol.* **147**, 103370 (2020).

350 Klinerová, T. & Dostál, P. Nutrient-demanding species face less negative competition and plant-soil feedback effects in a nutrient-rich environment. *New Phytol.* **225**, 1343-1354 (2020).

351 Heinen, R., Biere, A. & Bezemer, T. M. Plant traits shape soil legacy effects on individual plant-insect interactions. *Oikos* **129**, 261-273 (2020).

352 Aldorfova, A., Knobova, P. & Munzbergova, Z. Plant-soil feedback contributes to predicting plant invasiveness of 68 alien plant species differing in invasive status. *Oikos* **129**, 1257-1270 (2020).

353 Heinze, J., Wacker, A. & Kulmatiski, A. Plant-soil feedback effects altered by aboveground herbivory explain plant species abundance in the landscape. *Ecology* **101**, e03023 (2020).

354 Singh, M. & Meyer, W. M., III. Plant-soil feedback effects on germination and growth of native and non-native species common across southern California. *Diversity-Basel* **12**, 217 (2020).

355 Wang, Y., Ni, G., Hou, Y., Wang, Q. & Huang, Q. Plant-soil feedbacks under resource limitation may not contribute to the invasion by annual Asteraceae plants. *Oecologia* **194**, 165-176 (2020).

356 Adu-Oppong, B. *et al.* Prairie plants harbor distinct and beneficial root-endophytic bacterial communities. *Plos One* **15**, e0234537 (2020).

357 Zhao, Y.-Z. *et al.* Release from below- and aboveground natural enemies contributes to invasion success of a temperate invader. *Plant Soil* **452**, 19-28 (2020).

358 Bennett, A. E., Rubert-Nason, K. R. & Lindroth, R. L. Response of aspen genotypes to browsing damage is not influenced by soil community diversity. *Plant Soil* **452**, 153-170 (2020).

359 Manrubia, M., van der Putten, W. H., Weser, C. & Veen, C. Rhizosphere and litter feedbacks to range-expanding plant species and related natives. *J. Ecol.* **108**, 353-365 (2020).

360 Jevon, F. V. *et al.* Seedling survival declines with increasing conspecific density in a common temperate tree. *Ecosphere* **11**, e03292 (2020).

361 Howard, M. M., Kao-Kniffin, J. & Kessler, A. Shifts in plant-microbe interactions over community succession and their effects on plant resistance to herbivores. *New Phytol.* **226**, 1144-1157 (2020).

362 Stein, C. & Mangan, S. A. Soil biota increase the likelihood for coexistence among competing plant species. *Ecology* **101**, e03147 (2020).

363 Xi, N., Bloor, J. M. G. & Chu, C. Soil microbes alter seedling performance and biotic interactions under plant competition and contrasting light conditions. *Ann. Bot.* **126**, 1089-1098 (2020).

364 Montesinos, D. & Callaway, R. M. Soil origin corresponds with variation in growth of an invasive *Centaurea*, but not of non-invasive congeners. *Ecology* **101**, e03141 (2020).

365 Crawford, K. M. & Hawkes, C. V. Soil precipitation legacies influence intraspecific plant-soil feedback. *Ecology* **101**, e03142 (2020).

366 Ma, H.-k. *et al.* Steering root microbiomes of a commercial horticultural crop with plant-soil feedbacks. *Appl. Soil Ecol.* **150**, 103468 (2020).

367 Hannula, S. E., Ma, H.-K., Perez-Jaramillo, J. E., Pineda, A. & Bezemer, T. M. Structure and ecological function of the soil microbiome affecting plant-soil feedbacks in the presence of a soil-borne pathogen. *Environ. Microbiol.* **22**, 660-676 (2020).

368 Duchicela, J., Bever, J. D. & Schultz, P. A. Symbionts as filters of plant colonization of islands: tests of expected patterns and environmental consequences in the galapagos. *Plants-Basel* **9**, 74 (2020).

369 Martin-Robles, N. *et al.* Crops and their wild progenitors recruit beneficial and detrimental soil biota in opposing ways. *Plant Soil* **456**, 159-173 (2020).

370 Kaplan, I. *et al.* Phylogenetic farming: can evolutionary history predict crop rotation via the soil microbiome? *Evol. Appl.* **13**, 1984-1999 (2020).

371 Mushonga, K., Steyn, J. M., Swart, W. J. & van der Waals, J. E. Plant-soil feedback responses of four dryland crop species under greenhouse conditions. *Plant-Environ. Interact.* **1**, 181-195 (2020).

372 Heinze, J. Herbivory by aboveground insects impacts plant root morphological traits. *Plant Ecol.* **221**, 725-732 (2020).

373 Bennett, S. I., Howard, C., Albrecht, R., Smith-Ramesh, L. M. & Reynolds, H. Simulated herbivory weakens plant-soil feedbacks in competitive mixtures of native and invasive woodland plants. *Front. Ecol. Evol.* **7**, 497 (2020).

374 Koorem, K. *et al.* Community-level interactions between plants and soil biota during range expansion. *J. Ecol.* **108**, 1860-1873 (2020).

375 Pangesti, N., Pineda, A., Hannula, S. E. & Bezemer, T. M. Soil inoculation alters the endosphere microbiome of chrysanthemum roots and leaves. *Plant Soil* **455**, 107-119 (2020).

376 Menalled, U. D. *et al.* Soil-mediated effects on weed-crop competition: Elucidating the role of annual and perennial Intercrop diversity legacies. *Agronomy-Basel* **10**, 1373 (2020).

377 Hahl, T. *et al.* Plant responses to diversity-driven selection and associated rhizosphere microbial communities. *Funct. Ecol.* **34**, 707-722 (2020).

378 Kostenko, O. & Bezemer, T. M. Abiotic and biotic soil legacy effects of plant diversity on plant performance. *Front. Ecol. Evol.* **8**, 451 (2020).

379 Bennett, J. A. *et al.* Resistance of soil biota and plant growth to disturbance increases with plant diversity. *Ecol. Lett.* **23**, 119-128 (2020).

380 Beck, J. J. Variation in plant-soil interactions among temperate forest herbs. *Plant Ecol.* **222**, 1225-1238 (2021).

381 Benning, J. W. & Moeller, D. A. Microbes, mutualism, and range margins: testing the fitness consequences of soil microbial communities across and beyond a native plant's range. *New Phytol.* **229**, 2886-2900 (2021).

382 Borda, V., Longo, S., Marro, N. & Urcelay, C. The global invader *Ligustrum lucidum* accumulates beneficial arbuscular mycorrhizal fungi in a novel range. *Plant Ecol.* **222**, 397-408 (2021).

383 Buerdsell, S. L., Milligan, B. G. & Lehnhoff, E. A. Invasive plant benefits a native plant through plant-soil feedback but remains the superior competitor. *Neobiota* 10.3897/neobiota.64.57746, 119-136 (2021).

384 Chen, P. D. *et al.* The effects of plant-soil feedback on invasion resistance are soil context dependent. *Oecologia* **197**, 213-222 (2021).

385 Connell, R. K., Zeglin, L. H. & Blair, J. M. Plant legacies and soil microbial community dynamics control soil respiration. *Soil Biol. Biochem.* **160**, 108350 (2021).

386 Coughlin, E. M., Shefferson, R. P., Clark, S. L. & Wurzburger, N. Plant-soil feedbacks and the introduction of *Castanea* (chestnut) hybrids to eastern North American forests. *Restor. Ecol.* **29**, e13326 (2021).

387 Davis, E. J., Grove, S., Haubensak, K. A. & Parker, I. M. A widespread nitrogen-fixing invader experiences negative soil feedbacks despite enhancing the abundance of beneficial soil microbes. *Plant Soil* **462**, 257-271 (2021).

388 De Long, J. R. *et al.* How plant-soil feedbacks influence the next generation of plants. *Ecol. Res.* **36**, 32-44 (2021).

389 Domínguez-Begines, J., Avila, J. M., García, L. V. & Gómez-Aparicio, L. Disentangling the role of oomycete soil pathogens as drivers of plant-soil feedbacks. *Ecology* **102**, e03430 (2021).

390 Dostál, P. The temporal development of plant-soil feedback is contingent on competition and nutrient availability contexts. *Oecologia* **196**, 185-194 (2021).

391 Esch, C. M. & Kobe, R. K. Short-lived legacies of *Prunus serotina* plant-soil feedbacks. *Oecologia* **196**, 529-538 (2021).

392 Friman, J. *et al.* Shoot and root insect herbivory change the plant rhizosphere microbiome and affects cabbage-insect interactions through plant-soil feedback. *New Phytol.* **232**, 2475-2490 (2021).

393 Grenzer, J. *et al.* Moderate plant-soil feedbacks have small effects on the biodiversity-productivity relationship: a field experiment. *Ecol. Evol.* **11**, 11651-11663 (2021).

394 Idbella, M. *et al.* Contrasting effects of Rhizophagus irregularis versus bacterial and fungal seed endophytes on*Trifolium repens* plant-soil feedback. *Mycorrhiza* **31**, 103-115 (2021).

395 in 't Zandt, D., Herben, T., van den Brink, A., Visser, E. J. W. & de Kroon, H. Species abundance fluctuations over 31 years are associated with plant-soil feedback in a species-rich mountain meadow. *J. Ecol.* **109**, 1511-1523 (2021).

396 Ke, P.-J., Zee, P. C. & Fukami, T. Dynamic plant-soil microbe interactions: the neglected effect of soil conditioning time. *New Phytol.* **231**, 1546-1558 (2021).

397 Koorem, K., Wilschut, R. A., Weser, C. & van der Putten, W. H. Disentangling nematode and arbuscular mycorrhizal fungal community effect on the growth of range-expanding *Centaurea stoebe* in original and new range soil. *Plant Soil* **466**, 207-221 (2021).

398 Liu, Y., Medeiros, J. S. & Burns, J. H. The soil biotic community protects *Rhododendron* spp. across multiple clades from the oomycete *Phytophthora cinnamomi* at a cost to plant growth. *Oecologia* **195**, 1-12 (2021).

399 Pan, Y., Yao, Z., Zhang, N. & Veen, G. F. The role of soil-borne fungi in driving the coexistence of *Pinus massoniana* and *Lithocarpus glaber* in a subtropical forest via plant-soil feedback. *J. Plant Ecol.* **14**, 1189-1203 (2021).

400 Qin, F. & Yu, S. Compatible mycorrhizal types contribute to a better design for mixed *Eucalyptus* plantations. *Front. Plant Sci.* **12**, 616726 (2021).

401 Siefert, A., Friesen, M. L., Zillig, K. W., Aguilar, J. & Strauss, S. Y. An experimental test of stabilizing forces in the field niche. *Ecology* **102**, e03290 (2021).

402 Tang, X. F., Wei, C. Q., Gao, L. L., Jia, B. B. & Lu, X. M. Similarity in fine-to-total root mass ratio leads to comparative plant-soil feedbacks between co-occurring native and invasive plants. *J. Plant Ecol.* **14**, 33-43 (2021).

403 Uddin, M. N., Asaeda, T., Sarkar, A., Ranawakage, V. P. & Robinson, R. W. Conspecific and heterospecific plant-soil biota interactions of *Lonicera japonica* in its native and introduced range: implications for invasion success. *Plant Ecol.* **222**, 1313-1324 (2021).

404 Wang, M. *et al.* An invasive plant rapidly increased the similarity of soil fungal pathogen communities. *Ann. Bot.* **127**, 327-336 (2021).

405 Wang, X., Yan, B., Shi, L. & Liu, G. Plant-soil feedback effects on the performance and functional traits of *Dodonaea viscosa* in a dry-hot valley, China. *Plant Ecol.* **222**, 1209-1224 (2021).

406 Wilschut, R. A. & van Kleunen, M. Drought alters plant-soil feedback effects on biomass allocation but not on plant performance. *Plant Soil* **462**, 285-296 (2021).

407 Wolfsdorf, G. *et al.* Inoculum origin and soil legacy can shape plant-soil feedback outcomes for tropical grassland restoration. *Restor. Ecol.* **29**, e13455 (2021).

408 Xu, Z., Guo, X., Caplan, J. S., Li, M. & Guo, W. Novel plant-soil feedbacks drive adaption of invasive plants to soil legacies of native plants under nitrogen deposition. *Plant Soil* **467**, 47-65 (2021).

409 Zhang, J. *et al.* Plant-microbial feedback in secondary succession of semiarid grasslands. *Sci. Total Environ.* **760**, 143389 (2021).

410 Zhang, J., Vrieling, K., Klinkhamer, P. G. L. & Bezemer, T. M. Exogenous application of plant defense hormones alters the effects of live soils on plant performance. *Basic Appl. Ecol.* **56**, 144-155 (2021).

411 Cadot, S. *et al.* Soil composition and plant genotype determine benzoxazinoid-mediated plant-soil feedbacks in cereals. *Plant Cell Environ.* **44**, 3502-3514 (2021).

412 Kumar, A. *et al.* Gone and forgotten: Facilitative effects of intercropping combinations did not carry over to affect barley performance in a follow-up crop rotation. *Plant Soil* **467**, 405-419 (2021).

413 Hassan, K., Carrillo, Y. & Nielsen, U. N. The effect of prolonged drought legacies on plant-soil feedbacks. *J. Veg. Sci.* **32**, e13100 (2021).

414 Jongen, R. *et al.* Plant community legacy effects on nutrient cycling, fungal decomposer communities and decomposition in a temperate grassland. *Soil Biol. Biochem.* **163**, 108450 (2021).

415 Dietrich, P., Eisenhauer, N., Otto, P. & Roscher, C. Plant history and soil history jointly influence the selection environment for plant species in a long-term grassland biodiversity experiment. *Ecol. Evol.* **11**, 8156-8169 (2021).

416 Xue, W. *et al.* Contrasting effects of plant-soil feedbacks on growth and morphology of physically-connected daughter and mother ramets in two clonal plants. *Plant Soil* **472**, 479-489 (2022).

417 Terrazas, R. A. *et al.* Defining composition and function of the rhizosphere microbiota of barley genotypes exposed to growth-limiting nitrogen supplies. *Msystems* **7**, e0093422 (2022).

418 Huangfu, C., Zhang, L. & Hui, D. Density-dependent plant-soil feedbacks of two plant species affected by plant competition. *Sci. Total Environ.* **807**, 150908 (2022).

419 Buchenau, N., van Kleunen, M. & Wilschut, R. A. Direct and legacy-mediated drought effects on plant performance are species-specific and depend on soil community composition. *Oikos* **2022**, e08959 (2022).

420 Lozano, Y. M., Aguilar-Trigueros, C. A., Ospina, J. M. & Rillig, M. C. Drought legacy effects on root morphological traits and plant biomass via soil biota feedback. *New Phytol.* **236**, 222-234 (2022).

421 Munoz-Ucros, J., Wilhelm, R. C., Buckley, D. H. & Bauerle, T. L. Drought legacy in rhizosphere bacterial communities alters subsequent plant performance. *Plant Soil* **471**, 443-461 (2022).

422 He, H. *et al.* Effects of different soils on the biomass and photosynthesis of *Rumex nepalensis* in subalpine region of southwestern China. *Forests* **13**, 73 (2022).

423 Aldorfová, A., Dostálek, T. & Münzbergová, Z. Effects of soil conditioning, root and shoot litter addition interact to determine the intensity of plant-soil feedback. *Oikos* **2022**, e09025 (2022).

424 Jevon, F. V. *et al.* Experimental and observational evidence of negative conspecific density dependence in temperate ectomycorrhizal trees. *Ecology* **103**, e3808 (2022).

425 Luo, L. *et al.* Foliar pathogen infection manipulates soil health through root exudate-modified rhizosphere microbiome. *Microbiol. Spectr.* **10**, e0241822 (2022).

426 Cowan, J. A., Grady, K. C., Dijkstra, P., Schwartz, E. & Gehring, C. A. Invasive and native grasses exert negative plant-soil feedbacks on the woody shrub *Artemisia tridentata*. *Oecologia* **199**, 1007-1019 (2022).

427 Van Nuland, M. E. E., Ke, P. J., Wan, J. & Peay, K. G. G. Mycorrhizal nutrient acquisition strategies shape tree competition and coexistence dynamics. *J. Ecol.* **111**, 564-577 (2022).

428 Mueller, T. L., Karlsen-Ayala, E., Moeller, D. A. & Bellemare, J. Of mutualism and migration: will interactions with novel ericoid mycorrhizal communities help or hinder northward Rhododendron range shifts? *Oecologia* **198**, 839-852 (2022).

429 Oduor, A. M. O., Adomako, M. O., Yuan, Y. G. & Li, J. M. Older populations of the invader *Solidago canadensis* exhibit stronger positive plant-soil feedbacks and competitive ability in China. *Am. J. Bot.* **109**, 1230-1241 (2022).

430 Jiang, Y., Wang, Z., Chu, C., Kembel, S. W. & He, F. Phylogenetic dependence of plant-soil feedback promotes rare species in a subtropical forest. *J. Ecol.* **110**, 1237-1246 (2022).

431 Bickford, W. A., Goldberg, D. E., Zak, D. R., Snow, D. S. & Kowalski, K. P. Plant effects on and response to soil microbes in native and non-native *Phragmites australis*. *Ecol. Appl.* **32**, e2565 (2022).

432 in 't Zandt, D. *et al.* Plant life-history traits rather than soil legacies determine colonisation of soil patches in a multi-species grassland. *J. Ecol.* **110**, 889-901 (2022).

433 Foster, B. S. *et al.* Plant performance responds to intraspecific variation in soil inocula from individual *Solidago* clones. *Plant Ecol.* **223**, 201-212 (2022).

434 Bennion, L. & Ward, D. Plant-soil feedback from eastern redcedar (*Juniperus virginiana*) inhibits the growth of grasses in encroaching range. *Ecol. Evol.* **12**, e9400 (2022).

435 Wang, Y. *et al.* Plant-soil feedback of the invasive *Sorghum halepense* on Hainan island, China. *Biol. Invasions* **24**, 1527-1537 (2022).

436 Xu, H., Qu, Q., Wang, Z., Xue, S. & Xu, Z. Plant-soil-enzyme C-N-P stoichiometry and microbial nutrient limitation responses to plant-soil feedbacks during community succession: a 3-year pot experiment in China. *Front. Plant Sci.* **13**, 1009886 (2022).

437 Hassan, K., Carrillo, Y. & Nielsen, U. N. Prolonged drought causes negative plant-soil feedbacks in grassland species under field conditions. *Soil Biol. Biochem.* **172**, 108772 (2022).

438 Du, E., Chen, Y., Li, Y., Sun, Z. & Gui, F. Rhizospheric *Bacillus*-facilitated effects on the growth and competitive ability of the invasive plant *Ageratina adenophora*. *Front. Plant Sci.* **13**, 882255 (2022).

439 Dostalek, T., Knappova, J. & Munzbergova, Z. The role of plant-soil feedback in long-term species coexistence cannot be predicted from its effects on plant performance. *Ann. Bot.* **130**, 535-546 (2022).

440 Spitzer, C. M. *et al.* Root traits and soil micro-organisms as drivers of plant-soil feedbacks within the sub-arctic tundra meadow. *J. Ecol.* **110**, 466-478 (2022).

441 McMahen, K. *et al.* Soil microbial legacies influence plant survival and growth in mine reclamation. *Ecol. Evol.* **12**, e9473 (2022).

442 Guo, X., Wang, P., Wang, X., Li, Y. & Ji, B. Specific plant mycorrhizal responses are linked to mycorrhizal fungal species interactions. *Front. Plant Sci.* **13**, 930069 (2022).

443 Remke, M. J., Johnson, N. C. & Bowker, M. A. Sympatric soil biota mitigate a warmer-drier climate for *Bouteloua gracilis*. *Glob. Change Biol.* **28**, 6280-6292 (2022).

444 Huberty, M. *et al.* Temporal changes in plant-soil feedback effects on microbial networks, leaf metabolomics and plant-insect interactions. *J. Ecol.* **110**, 1328-1343 (2022).

445 Koyama, A., Dias, T. & Antunes, P. M. Application of plant-soil feedbacks in the selection of crop rotation sequences. *Ecol. Appl.* **32**, e2501 (2022).

446 Lozano, Y. M. M. & Rillig, M. C. C. Legacy effect of microplastics on plant-soil feedbacks. *Front. Plant Sci.* **13**, 965576 (2022).

447 Xi, N., Crawford, K. M. & De Long, J. R. Plant landscape abundance and soil fungi modulate drought effects on plant-soil feedbacks. *Oikos* **2022**, e08836 (2022).

448 Bolin, L. G. & Lau, J. A. Linking genetic diversity and species diversity through plant-soil feedback. *Ecology* **103**, e3692 (2022).

449 Chen, D. & van Kleunen, M. Invasional meltdown mediated by plant-soil feedbacks may depend on community diversity. *New Phytol.* **235**, 1589-1598 (2022).

450 Xue, W. *et al.* Current plant diversity but not its soil legacy influences exotic plant invasion. *J. Plant Ecol.* **15**, 639-649 (2022).

451 Xi, N. *et al.* Drought soil legacy alters drivers of plant diversity-productivity relationships in oldfield systems. *Sci. Adv.* **8**, eabn3368 (2022).

452 Gao, L. *et al.* Aboveground herbivory can promote exotic plant invasion through intra- and interspecific aboveground-belowground interactions. *New Phytol.* **237**, 2347-2359 (2023).

453 Xia, Z., He, Y., Korpelainen, H., Niinemets, U. & Li, C. Allelochemicals and soil microorganisms jointly mediate sex-specific belowground interactions in dioecious *Populus cathayana*. *New Phytol.* **240**, 1519-1533 (2023).

454 Medeiros, A. S. *et al.* Arbuscular mycorrhizal fungi communities shaped by host-plant affect the outcome of plant-soil feedback in dryland restoration. *J. Appl. Ecol.* **60**, 507-518 (2023).

455 Aaronson, J. K., Kulmatiski, A., Forero, L. E., Grenzer, J. & Norton, J. M. Are plant-soil feedbacks caused by many weak microbial interactions? *Biology-Basel* **12**, 1374 (2023).

456 Kalachova, T. *et al.* Controlled natural selection of soil microbiome through plant-soil feedback confers resistance to a foliar pathogen. *Plant Soil* **485**, 181-195 (2023).

457 Chung, Y. A., Monaco, T. A. A., Taylor, J. B. & Adler, P. B. B. Do plant-soil feedbacks promote coexistence in a sagebrush steppe? *Ecology* **104**, e4056 (2023).

458 Huang, L., Chen, R. Y., Xue, W. & Yu, F. H. Effects of scale and contrast of spatial heterogeneity in plant-soil feedbacks on plant growth. *Sci. Total Environ.* **878**, 163159 (2023).

459 Zettlemoyer, M. A. & Cortijo-Robles, K. M. Extant species are more responsive than locally extinct species to warming effects on soil communities. *Plant Soil* **485**, 117-131 (2023).

460 Liu, M., Wang, J., Zhao, W., Korpelainen, H. & Li, C. Females face more positive plant-soil feedback and intersexual competition under adequate nitrogen conditions compared to males in *Populuscathayana*. *Sci. Total Environ.* **874**, 162479 (2023).

461 Zhao, W., Wang, X., Howard, M. M., Kou, Y. & Liu, Q. Functional shifts in soil fungal communities regulate differential tree species establishment during subalpine forest succession. *Sci. Total Environ.* **861**, 160616 (2023).

462 Rallo, P. *et al.* Inter- and intraspecific plant-soil feedbacks of grass species. *Plant Soil* **486**, 575-586 (2023).

463 Collins, C. G. G., Spasojevic, M. J. J., Pombubpa, N. & Diez, J. M. M. Legacy effects post removal of a range-expanding shrub influence soil fungal communities and create negative plant-soil feedbacks for conspecific seedlings. *Plant Soil* **485**, 143-165 (2023).

464 Hodgson, R. J. *et al.* Local and non-local soil microbiota impede germination of the endangered *Acacia whibleyana*. *Austral Ecol.* **48**, 339-358 (2023).

465 Goossens, E. P., Minden, V., Van Poucke, F. & Olde Venterink, H. Negative plant-soil feedbacks disproportionally affect dominant plants, facilitating coexistence in plant communities. *NPJ biodivers.* **2**, 27 (2023).

466 Zhang, P., Bonte, D., De Deyn, G. & Vandegehuchte, M. L. Plant clustering generates negative plant-soil feedback without changing the spatial distribution of soil fauna. *Web Ecol.* **23**, 1-15 (2023).

467 Ai, Z. *et al.* Plant traits variably respond to plant-soil interactions during secondary succession on the Loess Plateau. *Forests* **14**, 726 (2023).

468 Wilschut, R. A., Hume, B. C. C., Mamonova, E. & van Kleunen, M. Plant-soil feedback effects on conspecific and heterospecific successors of annual and perennial Central European grassland plants are correlated. *Nat. Plants* **9**, 1057-1066 (2023).

469 Zhang, L. *et al.* Plant-soil feedback of companion species during grassland community succession. *Forests* **14**, 1634 (2023).

470 Qu, Q., Xu, H., Wang, M., Liu, G. & Xue, S. Plant-soil feedback plays an important role in the progression of plant community succession. *J. Soil Sci. Plant Nutr.* **186**, 169-176 (2023).

471 Kut'akova, E., Meszarosova, L., Baldrian, P., Muenzbergova, Z. & Herben, T. Plant-soil feedbacks in a diverse grassland: soil remembers, but not too much. *J. Ecol.* **111**, 1203-1217 (2023).

472 Begum, G., Gao, J.-Q., Xue, W. & Yu, F.-H. Plant-soil feedbacks in *Hydrocotyle vulgaris:* genotypic differences and relations to functional traits. *Ecol. Indic.* **146**, 109766 (2023).

473 Bennett, J. A., Franklin, J. & Karst, J. Plant-soil feedbacks persist following tree death, reducing survival and growth of *Populus tremuloides* seedlings. *Plant Soil* **485**, 103-115 (2023).

474 Florianova, A. *et al.* Plant-soil interactions in the native range of two congeneric species with contrasting invasive success. *Oecologia* **201**, 461-477 (2023).

475 Duell, E. B., Bever, J. D. & Wilson, G. W. T. Role of plant relatedness in plant-soil feedback dynamics of sympatric *Asclepias* species. *Ecol. Evol.* **13**, e9763 (2023).

476 Steinauer, K. *et al.* Root exudates and rhizosphere microbiomes jointly determine temporal shifts in plant-soil feedbacks. *Plant Cell Environ.* **46**, 1885-1899 (2023).

477 Eck, J. L., Delavaux, C. S., Wilson, D. M., Queenborough, S. A. & Comita, L. S. Seedling performance in a dioecious tree species is similar near female and male conspecific adults despite differences in colonization by arbuscular mycorrhizal fungi. *Oikos* **2023**, e09974 (2023).

478 Beckman, N. G. G., Dybzinski, R. & Tilman, D. Short-term plant-soil feedback experiment fails to predict outcome of competition observed in long-term field experiment. *Ecology* **104**, e3883 (2023).

479 Bennett, S. I. & Reynolds, H. L. Simulated aboveground herbivory is not a source of context dependence in plant-soil feedbacks for individually-grown native and invasive woodland plants. *Plant Soil* **485**, 133-142 (2023).

480 Qu, Q., Xu, H., Liu, G. & Xue, S. Soil legacy effects and plant-soil feedback contribution to secondary succession processes. *Soil Ecol. Lett.* **5**, 220131 (2023).

481 Majumdar, S. *et al.* Synergistic effects of canopy chemistry and autogenic soil biota on a global invader. *J. Ecol.* **111**, 1497-1513 (2023).

482 Wood, K. E. A., Kobe, R. K., Ibanez, I. & McCarthy-Neumann, S. Tree seedling functional traits mediate plant-soil feedback survival responses across a gradient of light availability. *Plos One* **18**, e0293906 (2023).

483 Gfeller, V. *et al.* Soil chemical and microbial gradients determine accumulation of root-exuded secondary metabolites and plant-soil feedbacks in the field. *J. Sustain. Agric. Environ.* **2**, 173-188 (2023).

484 Gfeller, V. *et al.* Plant secondary metabolite-dependent plant-soil feedbacks can improve crop yield in the field. *Elife* **12**, e84988 (2023).

485 Kuerban, M., Cong, W.-F., Jing, J. & Bezemer, T. M. Microbial soil legacies of crops under different water and nitrogen levels determine succeeding crop performance. *Plant Soil* **485**, 167-180 (2023).

486 Quattrone, A., Yang, Y., Yadav, P., Weber, K. A. & Russo, S. E. Nutrient and microbiome-mediated plant-soil feedback in domesticated and wild andropogoneae: implications for agroecosystems. *Microorganisms* **11**, 2978 (2023).

487 Xi, N. *et al.* Light availability and plant shade tolerance modify plant-microbial interactions and feedbacks in subtropical trees. *New Phytol.* **238**, 393-404 (2023).

488 Wang, X.-Y., Gao, S., Chen, T., Wang, J. & Yu, F.-H. Interactions between soil microbes and native species drive a diversity-invasibility relationship. *Biol. Invasions* **25**, 1461-1472 (2023).

489 Zhu, S.-C. *et al.* Abiotic legacies mediate plant-soil feedback during early vegetation succession on rare earth element mine tailings. *J. Appl. Ecol.* **61**, 489-501 (2024).

490 Waller, L. P. *et al.* Asymmetric sharing of generalist pathogens between exotic and native plants correlates with exotic impact in communities. *J. Ecol.* **112**, 2264-2276 (2024).

491 Przybylska, M. S. *et al.* Can plants build their niche through modulation of soil microbial activities linked with nitrogen cycling? A test with *Arabidopsis thaliana*. *New Phytol.* **243**, 620-635 (2024).

492 Liu, Z.-Q. *et al.* Differential effects of leaf litter and rhizosphere soil microbes on competition between invasive and native plants. *Environ. Exp. Bot.* **227**, 105947 (2024).

493 Liu, X. *et al.* Distance- and density-dependent recruitment of common ragwort is not driven by plant-soil feedbacks. *Basic Appl. Ecol.* **76**, 1-13 (2024).

494 Zeng, Z.-Y. *et al.* Distinct effects of phyllosphere and rhizosphere microbes on invader *Ageratina adenophora* during its early life stages. *Elife* **13**, RP95502 (2024).

495 McIntosh, M., Bullington, L. S., Lekberg, Y. & Fishman, L. Divergence in responsiveness to soil biota and mycorrhizal partner specificity between montane annual and coastal perennial ecotypes of yellow monkeyflower (*Mimulus guttatus*). *Int. J. Plant Sci.* **185**, 412-427 (2024).

496 Lee, S. F. H., Chapman, S. K., Mozdzer, T. J., Eller, F. & Langley, J. A. Does introduced European *Phragmites australis* experience belowground microbial enemy release in North America? *Ecosphere* **15**, e4952 (2024).

497 Meng, Y. *et al.* Enhanced mutualism: a promotional effect driven by bacteria during the early invasion of *Phytolacca americana*. *Ecol. Appl.* **34**, e2742 (2024).

498 Hopkins, J. R. & Bennet, A. E. Fire effects on soil biota alter the strength and direction of plant-soil feedbacks between *Schizachyrium scoparium* (Michx.) Nash and *Rudbeckia hirta* L. *Plant Soil* 10.1007/s11104-024-06585-y (2024).

499 Chang, J., Xie, J., Lkhagva, A., Wu, H. & Ren, H. Grazing increases the positive feedback of legumes while decreasing the negative feedback of grass. *Land Degrad. Dev.* **35**, 3102-3111 (2024).

500 Pajares-Murgo, M. *et al.* Intransitivity in plant-soil feedbacks is rare but is associated with multispecies coexistence. *Ecol. Lett.* **27**, e14408 (2024).

501 Cheng, C. *et al.* Intraspecific diversity mitigates the negative soil-legacy impacts of an invasive plant. *New Phytol.* **245**, 1277–1287 (2024).

502 Eck, J. L., Hassan, L. H. & Comita, L. S. Intraspecific plant-soil feedback in four tropical tree species is inconsistent in a field experiment. *Am. J. Bot.* **111**, e16331 (2024).

503 Pan, L. *et al.* Intraspecific variation in Janzen-Connell effect is mediated by stress and plant-soil feedbacks. *Ecol. Evol.* **14**, e11614 (2024).

504 Chen, D., van Kleunen, M., Wang, Y.-J. & Yu, F.-H. Invasive and native plants show different root responses to feedback-mediated soil heterogeneity. *Plant Soil* **494**, 497-508 (2024).

505 Idbella, M., Baronti, S., Vaccari, F. P., Abd-ElGawad, A. M. & Bonanomi, G. Long-term application of biochar mitigates negative plant-soil feedback by shaping arbuscular mycorrhizal fungi and fungal pathogens. *Microorganisms* **12**, 810 (2024).

506 Chen, D. & van Kleunen, M. Negative conspecific plant-soil feedback on alien plants co-growing with natives is partly mitigated by another alien. *Plant Soil* **505**, 733–745 (2024).

507 Idbella, M. *et al.* Negative plant-soil feedback in *Arabidopsis thaliana*: disentangling the effects of soil chemistry, microbiome, and extracellular self-DNA. *Microbiol. Res.* **281**, 127634 (2024).

508 Casper, C. W. *et al.* Negative plant-soil feedback influences a dominant seeded species, Western yarrow (*Achillea millefolium*), in grassland restoration. *Restor. Ecol.* **32**, e14271 (2024).

509 Xue, W. *et al.* Number of global change factors alters plant-soil feedbacks via its effect on soil fungal communities. *Soil Biol. Biochem.* **194**, 109443 (2024).

510 Enderle, E. *et al.* Plant-soil feedback responses to drought are species-specific and only marginally predicted by root traits. *Plant Soil* 10.1007/s11104-024-07049-z (2024).

511 Straus, D. *et al.* Plant-soil feedbacks among boreal forest species. *J. Ecol.* **112**, 138-151 (2024).

512 Gerstner, B. P., Laport, R. G., Rudgers, J. A. & Whitney, K. D. Plant-soil microbe feedbacks depend on distance and ploidy in a mixed cytotype population of *Larrea tridentata*. *Am. J. Bot.* **111**, e16298 (2024).

513 Hassan, K., Carrillo, Y., Islam, T. & Nielsen, U. N. Prolonged drought legacies influence the performance of foliar herbivores on legumes through shifts in plant-soil biotic interactions. *Entomol. Exp. Appl.* **173**, 60-70 (2024).

514 Dabu, X., Ji, H., Yang, L., Bezemer, T. M. & Jing, J. Root traits and soil legacies drive species competition outcomes. *Funct. Ecol.* **38**, 2139-2155 (2024).

515 Morman, K. E. *et al.* Simulated fire and plant-soil feedback effects on mycorrhizal fungi and invasive plants. *Iscience* **27**, 111193 (2024).

516 Minas, A., Garcia-Parisi, P. A. & Omacini, M. The soil legacy produced by grass-endophyte-mycorrhizae fungi interaction increases legume establishment. *Symbiosis* **93**, 297-308 (2024).

517 Chu, Q. *et al.* Soil microbial community contributes more to plant-soil feedback and plant-plant interactions than root traits under warming and drought. *Plant Soil* 10.1007/s11104-024-06606-w (2024).

518 Xu, W. *et al.* Synergistic changes in AM fungi and soil abiotic properties in rhizosphere soils of invasive *Solidago canadensis* may confer its stronger dominance in communities. *Plant Soil* **498**, 561-577 (2024).

519 Liu, X., Steinauer, K., van Der Veen-van Wijk, K. & Bezemer, T. M. Zooming in on the temporal dimensions of plant-soil feedback: plant sensitivity and microbial dynamics. *J. Ecol.* **00**, 1-14 (2024).

520 Wang, T. *et al.* Effect of plant-derived microbial soil legacy in a grafting system-a turn for the better. *Microbiome* **12**, 234 (2024).

521 Gfeller, V., Thoenen, L. & Erb, M. Root-exuded benzoxazinoids can alleviate negative plant-soil feedbacks. *New Phytol.* **241**, 2575-2588 (2024).

522 Li, C. *et al.* Restoration of degraded alpine meadows from the perspective of plant-soil feedbacks. *Biol. Fertil. Soils* **60**, 941-953 (2024).

523 Zhou, T., Sun, J. & Shi, P. Mechanism of plant-soil feedback in a degraded alpine grassland on the Tibetan Plateau. *J. Plant Ecol.* **17**, rtae025 (2024).

524 Ali, H. E., Al-Wahaibi, A. M. & Shahid, M. S. Plant-soil feedback and plant invasion: effect of soil conditioning on native and invasive *Prosopis* species using the plant functional trait approach. *Front. Plant Sci.* **15**, 1321950 (2024).

525 Dhiedt, E., Baeten, L., Smedt, P., Jaroszewicz, B. & Verheyen, K. Soil legacies of tree species composition in mature forest affect tree seedlings' performance. *Ecosystems* **27**, 815-832 (2024).

526 Tao, Z. *et al.* Native plant diversity generates microbial legacies that either promote or suppress non-natives, depending on drought history. *Ecol. Lett.* **27**, e14504 (2024).

527 Pan, Y. *et al.* Plant-soil feedback is dependent on tree mycorrhizal types and tree species richness in a subtropical forest. *Geoderma* **442**, 116780 (2024).

528 Yacine, Y. *et al.* Between- versus within-species variation in plant-soil feedback relates to different functional traits, but exudate variability is involved at both scales. *Funct. Ecol.* **38**, 1156-1171 (2024).
